# Supplementary material
Source: PubMed Central journal article supplement (PMC5293045)
Supplement: pnas.1613870114.sapp.pdf [file pnas.1613870114.sapp.pdf]

**Comparative genomics reveals convergent evolution between the  
bamboo-eating giant and red pandas**

*SI Appendix*

**Include:**

**Materials and Methods**

**References**

**Supplementary Figure S1-S12**

**Supplementary Table S1-S29**

## ***Materials and Methods***

**Estimation of Red Panda Genome Size.** We estimated the genome size of the red panda using K-mer frequency analysis with a K-mer size of 61, following the method in ref. 1. The red panda was estimated to have a genome size of ~2.38 Gb (Fig. S1).

**Genome Sequencing.** The red panda genome was sequenced using a whole-genome shotgun approach. Genomic DNA was extracted from whole blood sample of a wild male red panda, and libraries of insert size 180 bp to 8 Kb were constructed with TruSeq DNA Library Prep Kit and Mate Pair Library Prep Kit (Illumina), which were then sequenced on the HiSeq 2000 platform. To make the assembly quality of the giant panda genome comparable to that of the red panda genome, we improved the giant panda genome assembly with new data. We generated Illumina sequence data for the same female giant panda (Jingjing) used in the reference genome release (version ailMel1). Since read length of the ailMel1 assembly was rather short (52 bp on average), about  $82 \times$  paired-end sequence data of 100 bp were generated for assembly improvement, in combination with published mate-pair sequence data (under GenBank accessions SRX007019 to SRX007029) (2).

**Genome Assembly for Contigs and Scaffolds.** The red and giant panda genomes were assembled by a number of steps with an aim to obtain the longest continuity while maintaining high base accuracy. Currently there are a number of assembly tools for selection. Some of them perform better in contig/scaffold length, while some of them excel in terms of base quality or scaffold accuracy. To achieve the best assembly, we need to combine the available assemblers, making use of the strength on one assembler and reducing the disadvantage of the same assembler. Multiple assemblies obtained are finally merged together. Fig. S2 shows the flowchart of our assembly working process. Raw sequencing reads were processed to filter out low quality data by Unikalow (<http://sourceforge.net/projects/phusion2/files/unikalow/>), which is part of Phusion2 assembly pipeline (3). Cleaned short-insert paired-end reads were assembled using a string graph based assembler Fermi (4). The assembly tool SOAPdenovo (5) was used to process the cleaned short-insert reads and mate-pair reads. The initial SOAP assembly

was improved using SSPACE (6) and scaffolds were further enhanced by the use of `cross_genome`, a tool which maps genome synteny to merge scaffolds, ([http://sourceforge.net/projects/phusion2/files/unikalow/cross\\_genome/](http://sourceforge.net/projects/phusion2/files/unikalow/cross_genome/)). The synteny-assisted scaffolding method has been successfully applied in the Tasmanian devil genome project (1) using opossum genome assembly and more recently in the grass carp genome assembly (7) using zebrafish genome. For both pandas' genome assembly, the dog genome (CamFam 3.1) was used as reference. Caution was taken to minimize the possibility of scaffold mis-joining based on cross-species genome synteny. Specifically, when a shared chromosomal rearrangement was observed between dog and panda, human genome was used independently for confirmation. After this step, we obtained the longest possible scaffolds: the SOAP-synteny assembly. In our experience, SOAPdenovo produces reliable scaffolds, but lacks accuracy at the contig level. Notably, a certain degree of mismatches, particularly short indels exist in the assembly. For applications in SNP/indel detection and downstream population analysis, an assembly with high base accuracy is needed. This could be achieved using the Fermi assembly to replace contig sequences in the SOAP-synteny assembly, while long scaffold structures from previous steps are kept unchanged. During the merging process, Fermi contigs were aligned firstly to the SOAP-synteny scaffolds and breakpoints were identified. For all aligned regions, sequences in the SOAP-synteny assembly were replaced by the contigs from the Fermi assembly. Gaps were closed when a piece of Fermi sequence bridged two neighboring SOAP contigs (<http://sourceforge.net/projects/phusion2/files/replace/>).

**Assessment of Genome Assembly Quality.** To assess sequencing and assembly accuracy of the red panda genome, a bacterial artificial chromosome (BAC) library was constructed, sequenced and assembled. Briefly, the pHZaubac1 vector (8) was used to construct the BAC library from kidney tissue dissected from a male red panda as used in the RNA-seq transcriptome sequencing. The library consists of 119,808 BAC clones with an average insert size of 137 Kb, giving approximately 7-fold genome equivalents. Five clones (135K16, 136M11, 138J8, 139H13, and 142G16) were selected for sequencing on the ABI 3730xl platform to approximately 6-fold coverage, following the standard Sanger shotgun approach. These capillary reads were then assembled by GAP4 of the

Staden Package (9), and gaps were filled by PCR to obtain complete sequence for each clone. The genome scaffolds were then aligned with BACs using BLAST (E-value =  $1e-20$ , 98% identity). The completeness of the red panda genome assembly was further assessed using the CEGMA and BUSCO methods.

**Genome GC Content.** We calculated the GC content and sequencing depth of the assembled red panda and giant panda genomes in 10 Kb non-overlapping sliding window. Since red panda genome sequencing was done for a male, two clustered islands were observed (Fig. S3), where the high coverage island corresponded to diploid scaffolds, and the low coverage region to haploid scaffolds. For the giant panda assembly, only one island was observed, since the sequenced individual “Jingjing” is female (Fig. S4). The GC distribution patterns of five Eutherian genomes, including red panda, giant panda, dog, human, and mouse were also compared (Fig. S5).

**Transcriptome Sequencing.** To facilitate genome annotation, RNA-seq was performed for eight tissues (pituitary, testis, pancreas, liver, stomach, duodenum, small intestine and spleen) from a recently deceased male red panda that was different from the one used for genome sequencing, and for 12 tissues from two recently deceased giant pandas (liver, stomach, small intestine, colon, pallium and testis from one male adult; pituitary, skeletal muscle, ovary, tongue and two skin tissues from one female adult). Paired-end libraries of insert size 500 bp were constructed with TruSeq RNA Library Prep Kit (Illumina), which were then sequenced on Illumina GAIIx and HiSeq 2000 platforms.

**Gene Prediction.** Protein sequences of human genes (GRCh 37.71) were aligned to the red and giant panda genomes by tBLASTn with an E-value of  $1e-10$ , and regions with no human homolog match were further searched with dog proteins (CanFam 3.1.71). RNA-seq data were mapped to the scaffolds by the aligner SMALT 0.7.4 (<http://www.sanger.ac.uk/resources/software/smalt/>), and the uniquely matched reads were selected for gene prediction. Based on the above two steps, potential coding regions were determined by extending 3 Kb to either end of the aligned regions. The

corresponding sequences were used to build preliminary gene models by Augustus 2.5.5 (10) and Fgenesh (11) with parameters trained by human genomes. The constructed preliminary gene models were aligned to the human and dog gene model set by BLASTp at E-value of  $1e-20$ . When a red panda (or giant panda) gene hits two or more adjacent human/dog genes, it was manually split according to alignment information. If two or more adjacent genes were aligned to a single human/dog homolog, they were merged together by GeneWise (12), referring to human/dog homolog structure. The longest protein was chosen to represent the merged gene. To remove the genes encoding transposable elements, the gene models were aligned to the Repbase library and the species' repeat element library, using BLASTn with an E-value of  $1e-5$ . For potential contamination from degenerated mobile elements, the predicted protein sequences were also aligned to the repeat protein library, and hits with an E-value of  $1e-5$  and  $1/3$  alignable length were filtered out. Finally, predicted proteins less than 30 amino acids were discarded.

**Detection of Non-Coding RNAs.** Non-coding RNAs of red panda were identified by searching databases using the genome sequence (Table S7). tRNAscan-SE (version 1.3.1) was used with default parameters to search for tRNAs (Table S8), and false-positive predictions from tRNA-derived SINEs were filtered out by two criteria: (1) a final bit score of less than 55 bits (50 bits for tRNA-SeC-TCA), and (2) are identified by only one of the two pre-filter scanners (trnscan 1.3 and EufindtRNA) (13). We searched the red panda rRNA by BLAST using human and dog full-length rRNA as queries (Identity > 90% and E-value <  $1e-10$ ). For snoRNA, snRNA, and miRNA, a two-step approach was applied: the genome sequence was first aligned onto the Rfam database (version 11.0), and genomic regions matching those known RNAs were retrieved by extending 3 Kb towards either end, which were then used for RNA prediction. snoRNA were analyzed by Snoscan (version 0.9 beta) for C/D box snoRNA, and snoGPS (version 0.2 beta) for H/ACA snoRNA with default parameters. snRNA and miRNA were identified by Infernal (version 1.1rc2) with E-value <  $1e-10$  and quality > 30.

**Repeat Element Annotation.** Repeat elements in the red panda genome were annotated using the following pipeline: (1) The genome was searched against the nucleotide repetitive database of Repbase (version 16.08) using RepeatMasker (version 4.0.2); (2) The genome was searched against the protein repetitive database using RepeatProteinMask; (3) Tandem repeats were identified by TRF (Tandem Repeat Finder, version 4.04) using default parameters; (4) RepeatModeler was used to construct a *de novo* repeat library of the red panda, which was then used as the database to find and classify repeat elements using RepeatMasker. A similar repeat element annotation strategy was applied to the improved giant panda genome, and the published dog and human genomes (Fig. S8; Tables S9-S11).

**Identification of Gene Family Expansion and Contraction.** We used the TreeFam methodology (14) to build gene families. The red panda and giant panda reference gene sets from this study were used, and protein-coding genes for six Eutherian species, including human (*Homo sapiens*), mouse (*Mus musculus*), dog (*Canis lupus familiaris*), ferret (*Mustela putorius furo*), tiger (*Panthera tigris*), and polar bear (*Ursus maritimus*) were downloaded from Ensembl release 71 (<http://www.ensembl.org>). While genes shorter than 30 amino acids were filtered out, the longest protein from alternative transcripts was chosen to represent each unique gene, and protein sequences were kept consistent with corresponding CDS. BLASTp was used to search against all of the protein sequences under an E-value of 1e-7, and fragmental alignments of each gene pair were concatenated by SOLAR

(<http://sourceforge.net/p/treesoft/code/HEAD/tree/branches/dev/>). A connection (edge) between two nodes (genes) was assigned if more than 1/3 of the region aligned to both genes, and a Hscore that ranged from 0 to 100 was used to weigh the similarity (edge). For two genes G1 and G2, the Hscore was defined as  $\text{score}(G1G2) / \max(\text{score}(G1G1), \text{score}(G2G2))$ , the score here was the BLAST raw bit score. Finally, gene families were extracted using the clustering algorithm Hcluster\_sg (<http://sourceforge.net/p/treesoft/code/HEAD/tree/branches/dev/>), with the following requirements: Hscore > 5, and edge density (total number of edges / theoretical number

of edges)  $> 1/3$ . Gene family data from TreeFam were introduced into CAFE 3.0 (15) to evaluate the expansion and contraction of gene families.

**Estimate of *TASIRI* Pseudogenization Time.** We estimated the waiting time until inactivation of the *TASIRI* gene ( $T_W$ ) using the method in ref. 16 with minor modification. The principle is to utilize a dramatic change in the degree of functional constraint ( $f$ ) at the nonsynonymous sites accompanying the loss of function. The  $f$  value is the ratio of nonsynonymous / synonymous substitution rates prior to functional relaxation, assumed to be constant among carnivores but became one at the time of inactivation ( $T_P$ ) (Ma, million years ago) in the red panda. Thus, we have

$$T = T_P + T_W$$

and

$$dN = dN_W + dN_P$$

where,  $T = 30$  MYA is the time since divergence between the red panda and ferret (17);  $dN$  is the total number of nonsynonymous substitutions per site for the red panda branch; and  $dN_W$  and  $dN_P$  are the total number of nonsynonymous substitutions per site for the red panda branch during  $T_W$  and  $T_P$  time, respectively.

If we denote the synonymous substitution rate per site by  $\mu$  per unit time, we have

$$dN = f\mu T_W + \mu T_P$$

Thus,

$$T_P = (dN - f\mu T) / (\mu(1-f))$$

Under the assumption of  $\mu = 10^{-9}$  per site per year, we can estimate  $f$  for the red panda and other carnivore branches using PAML. By bootstrapping the codons of *TASIRI* 10,000 times, we estimated the frequency distribution of  $T_P$ . We considered a  $t$  value to be valid when it is between 0 and 19 and subsequently derived a posterior distribution of  $T_P$ .

## References

1. Murchison EP, et al. (2012) Genome sequencing and analysis of the Tasmanian devil and its transmissible cancer. *Cell* 148(4):780-791.
2. Li R, et al. (2010) The sequence and *de novo* assembly of the giant panda genome. *Nature* 463(7279):311-317.
3. Mullikin JC, Ning Z (2003) The Phusion Assembler. *Genome Res* 13(1):81-90.
4. Li H (2012) Exploring single-sample SNP and INDEL calling with whole-genome *de novo* assembly. *Bioinformatics* 28(14):1838-1844.
5. Li R, et al. (2010) *De novo* assembly of human genomes with massively parallel short read sequencing. *Genome Res* 20(2):265-272.
6. Boetzer M, Henkel CV, Jansen HJ, Butler D, Pirovano W (2011) Scaffolding pre-assembled contigs using SSPACE. *Bioinformatics* 27(4):578-579.
7. Wang Y, et al. (2015) The draft genome of the grass carp (*Ctenopharyngodon idellus*) provides insights into its evolution and vegetarian adaptation. *Nat Genet* 47(6):625-631.
8. Shi X, Zeng H, Xue Y, Luo M (2011) A pair of new BAC and BIBAC vectors that facilitate BAC/BIBAC library construction and intact large genomic DNA insert exchange. *Plant Methods* 7:33.
9. Staden R, Beal KF, Bonfield JK (2000) The Staden package, 1998. *Methods Mol Biol* 132:115-130.
10. Stanke M, et al. (2006) AUGUSTUS: ab initio prediction of alternative transcripts. *Nucleic Acids Res* 34(suppl 2):W435-W439.
11. Solovyev V, Kosarev P, Seledsov I, Vorobyev D (2006) Automatic annotation of eukaryotic genes, pseudogenes and promoters. *Genome Biol* 7(suppl 1):S10.
12. Birney E, Clamp M, Durbin R (2004) GeneWise and Genomewise. *Genome Res*



14(5):988-995.

13. Chan PP, Lowe TM (2009) GtRNAdb: A database of transfer RNA genes detected in genomic sequence. *Nucleic Acids Res* 37: D93-D97.
14. Li H, et al. (2006) TreeFam: a curated database of phylogenetic trees of animal gene families. *Nucleic Acids Res* 34(suppl 1):D572-D580.
15. De Bie T, Cristianini N, Demuth JP, Hahn MW (2006) CAFE: a computational tool for the study of gene family evolution. *Bioinformatics* 22(10):1269-1271.
16. Oda M, Satta Y, Takenaka O, Takahata N (2002) Loss of urate oxidase activity in hominoids and its evolutionary implications. *Mol Biol Evol* 19(5):640-653.
17. Sato JJ, et al. (2009) Deciphering and dating the red panda's ancestry and early adaptive radiation of Musteloidea. *Mol Phylogenet Evol* 53(3):907-922.
18. Zhao S, et al. (2013) Whole-genome sequencing of giant pandas provides insights into demographic history and local adaptation. *Nat Genet* 45(1):67-71.
19. Liu S, et al. (2014) Population genomics reveal recent speciation and rapid evolutionary adaptation in polar bears. *Cell* 157(4):785-794.
20. Liu X, Li M, Yu J, Huang X (2005) Study on the amino acids of bamboo ingested by captive giant panda. *J Econom Anim* 9(1):30-34.
21. Liu B, Fan J, Hu T, Zhang F (2008) Determination and nutritional evaluation of amino acids in staple food bamboo for giant panda in Qinling Mountains. *J Anhui Agri Sci* 36(21):9024-9026.
22. Loor JJ, Herbein JH, Polan CE (2002) Trans 18:1 and 18:2 isomers in blood plasma and milk fat of grazing cows fed a grain supplement containing solvent-extracted or mechanically extracted soybean meal. *J Dairy Sci* 85(5):1197-1207.
23. Rule DC, Broughton KS, Shellito SM, Maiorano G (2002) Comparison of muscle fatty acid profiles and cholesterol concentrations of bison, beef cattle, elk, and chicken. *J Anim Sci* 80(5):1202-1211.
24. Li Y, Hu G, Li X (1993) Measure of vitamins and minerals in daily diet of giant pandas. *Foreign Forestry* 23(1):25-27.

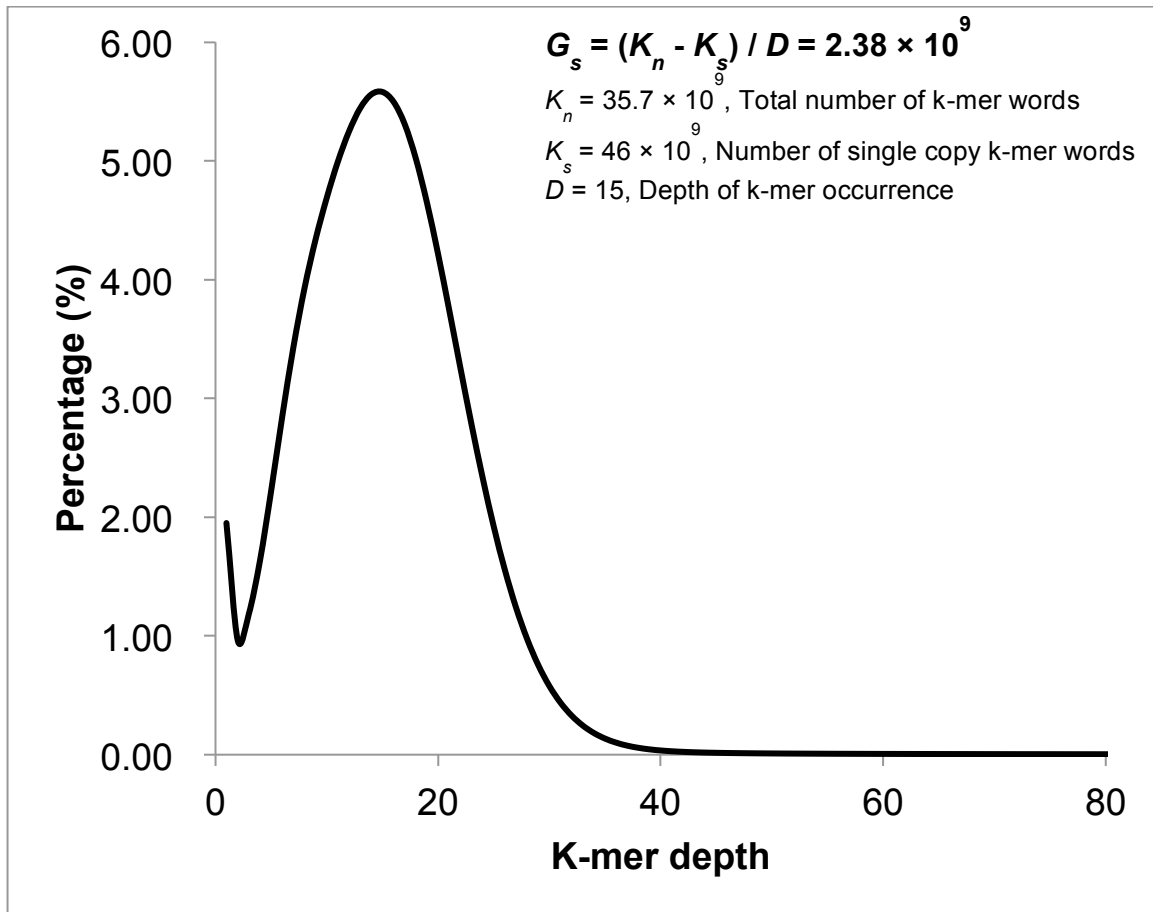

**Fig. S1.** Genome size estimation of the red panda using K-mer frequency distribution. The x-axis indicates the depth of each unique 61-mer in the red panda genome, and the y-axis denotes the percentage of genome for occurrence of unique 61-mer within the sequence dataset. For this analysis, only paired-end reads were used after contamination filtering and base error correction.

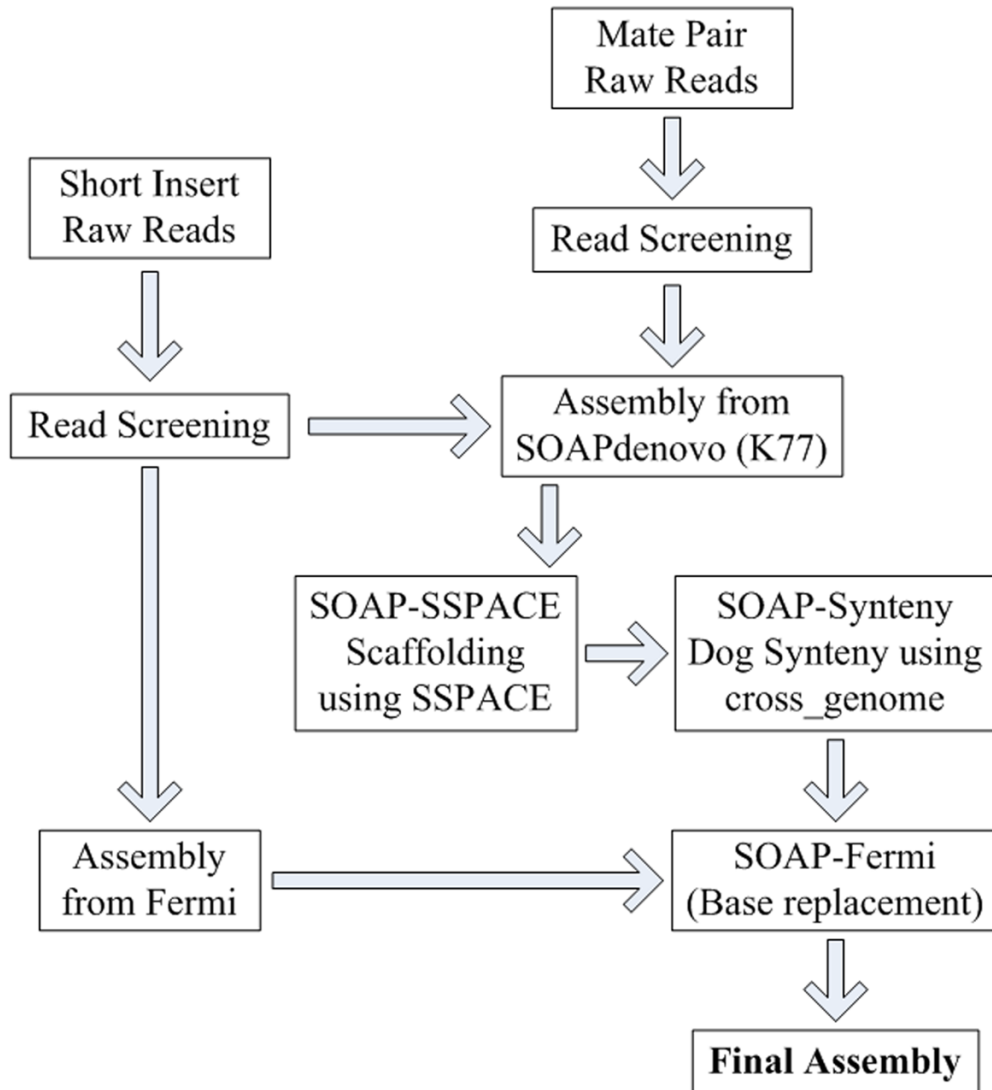

**Fig. S2.** *De novo* genome assembly flowchart.

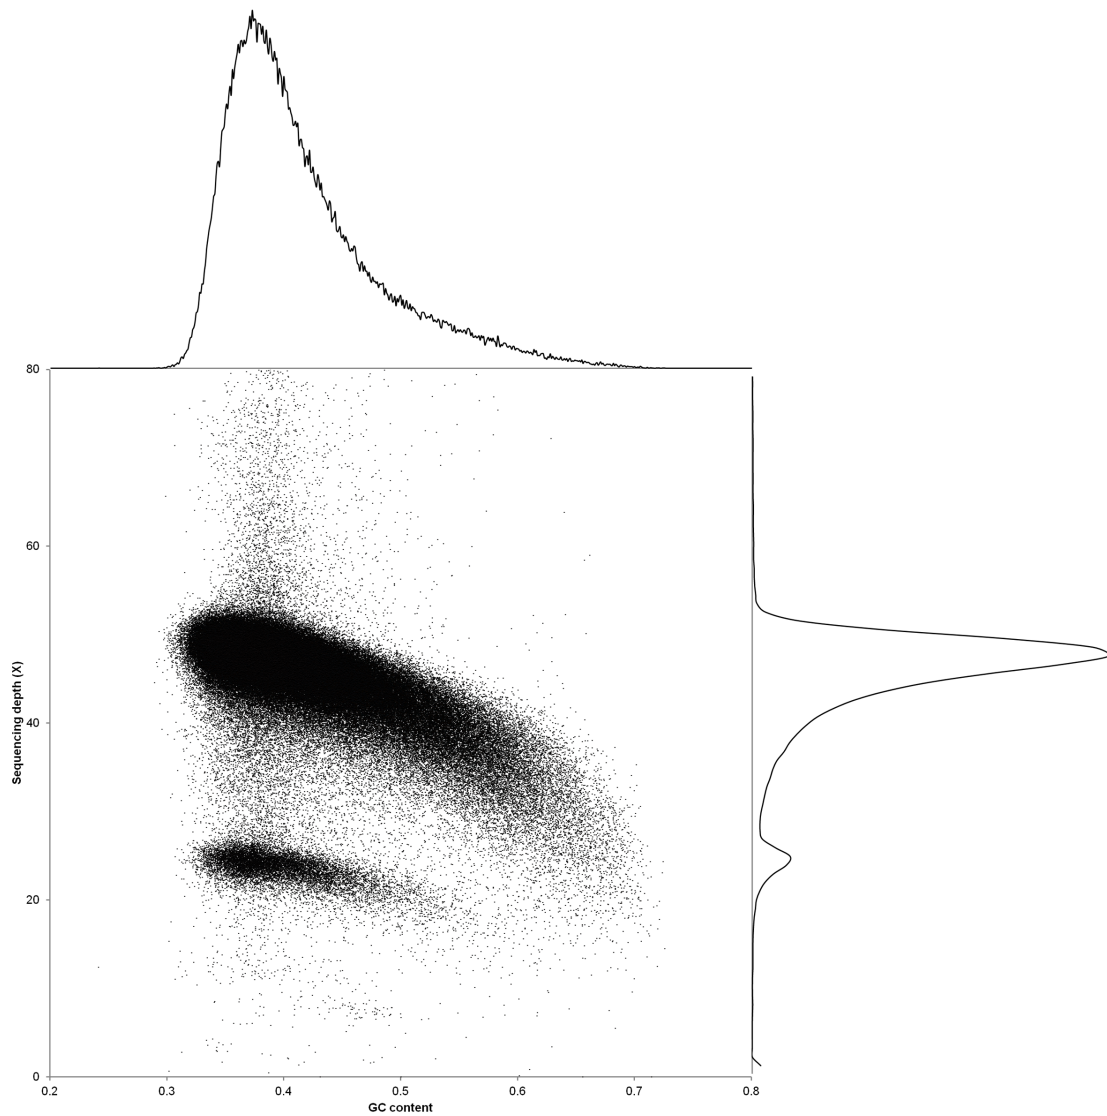

**Fig. S3.** Distribution of GC content and sequencing depth of the red panda genome. The x-axis represents GC content, and the y-axis indicates average sequencing depth. The filtered reads were aligned onto the assembled genome using SOAPaligner with default parameters, and sequencing depth was then calculated for each base of the genome. Data was calculated per 10 Kb non-overlapping sliding window.

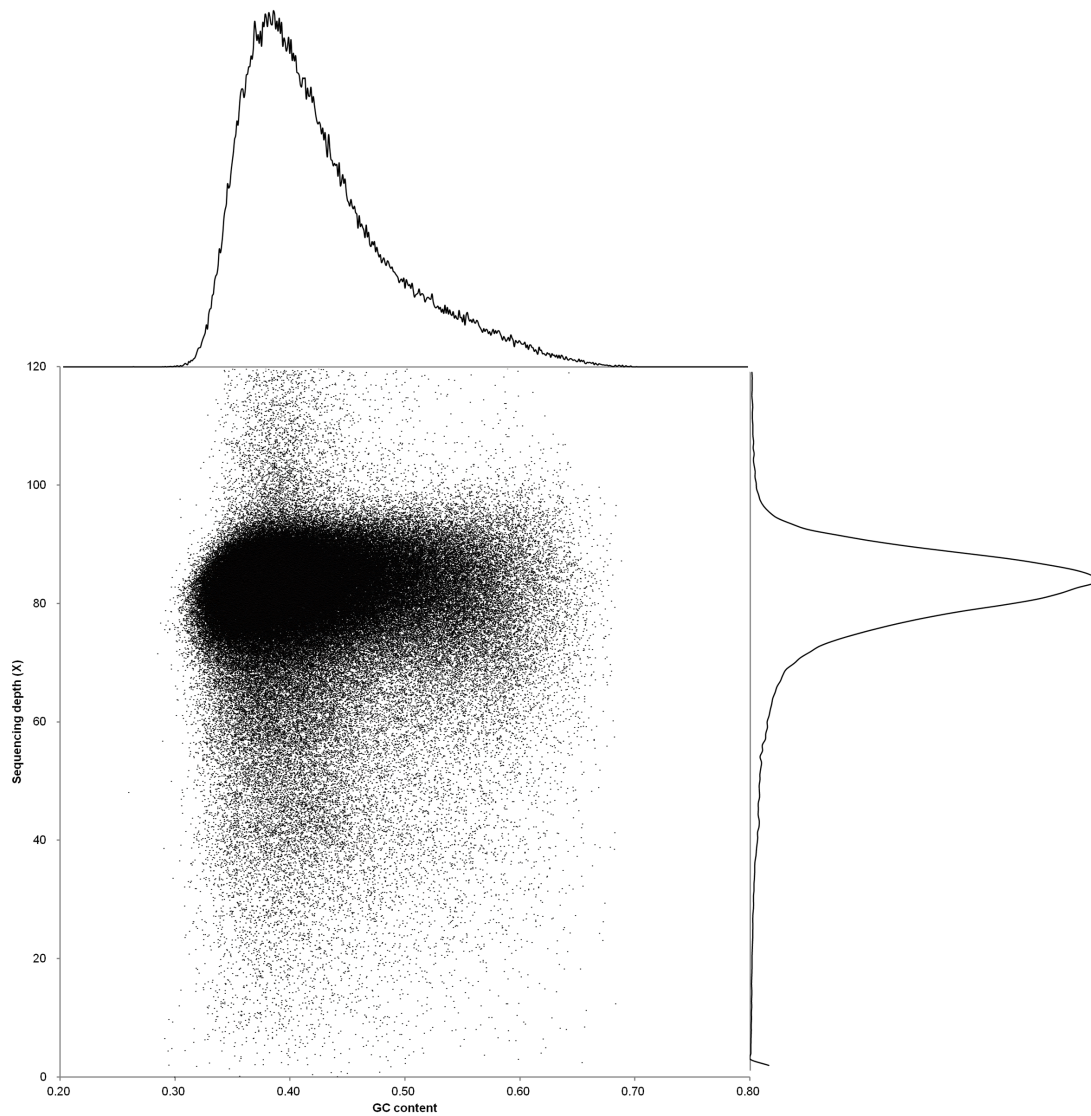

**Fig. S4.** Distribution of GC content and sequencing depth of the giant panda genome. The x-axis represents GC content, and the y-axis indicates average sequencing depth. The filtered reads were aligned onto the assembled genome using SOAPaligner with default parameters, and sequencing depth was then calculated for each base of the genome. Data was calculated per 10 Kb non-overlapping sliding window.

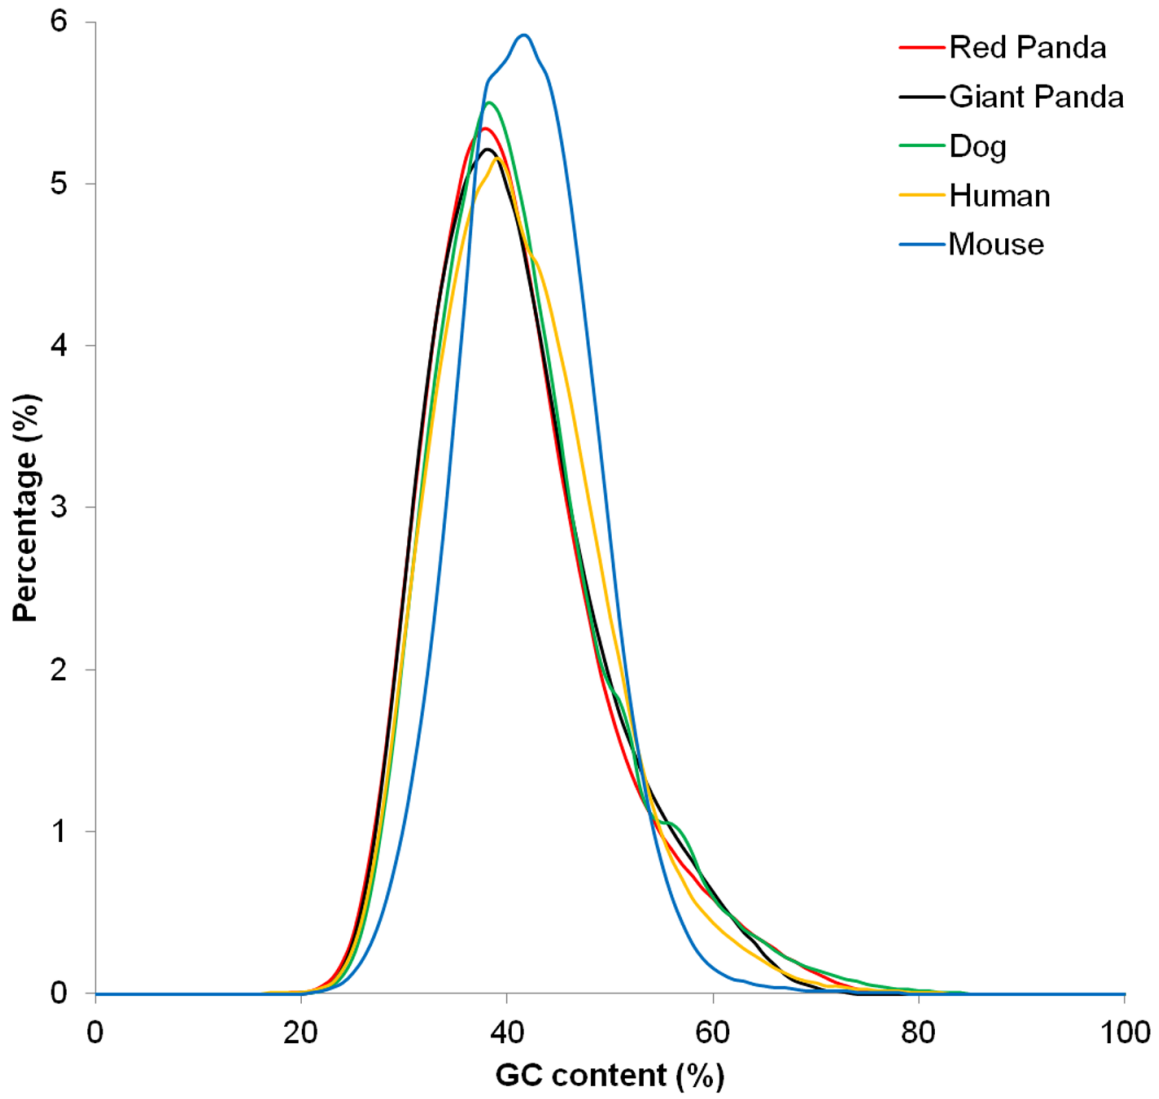

**Fig. S5.** Comparison of the GC content distribution of five Eutherian genomes in 500 bp non-overlapping sliding windows.

(A) 135K16

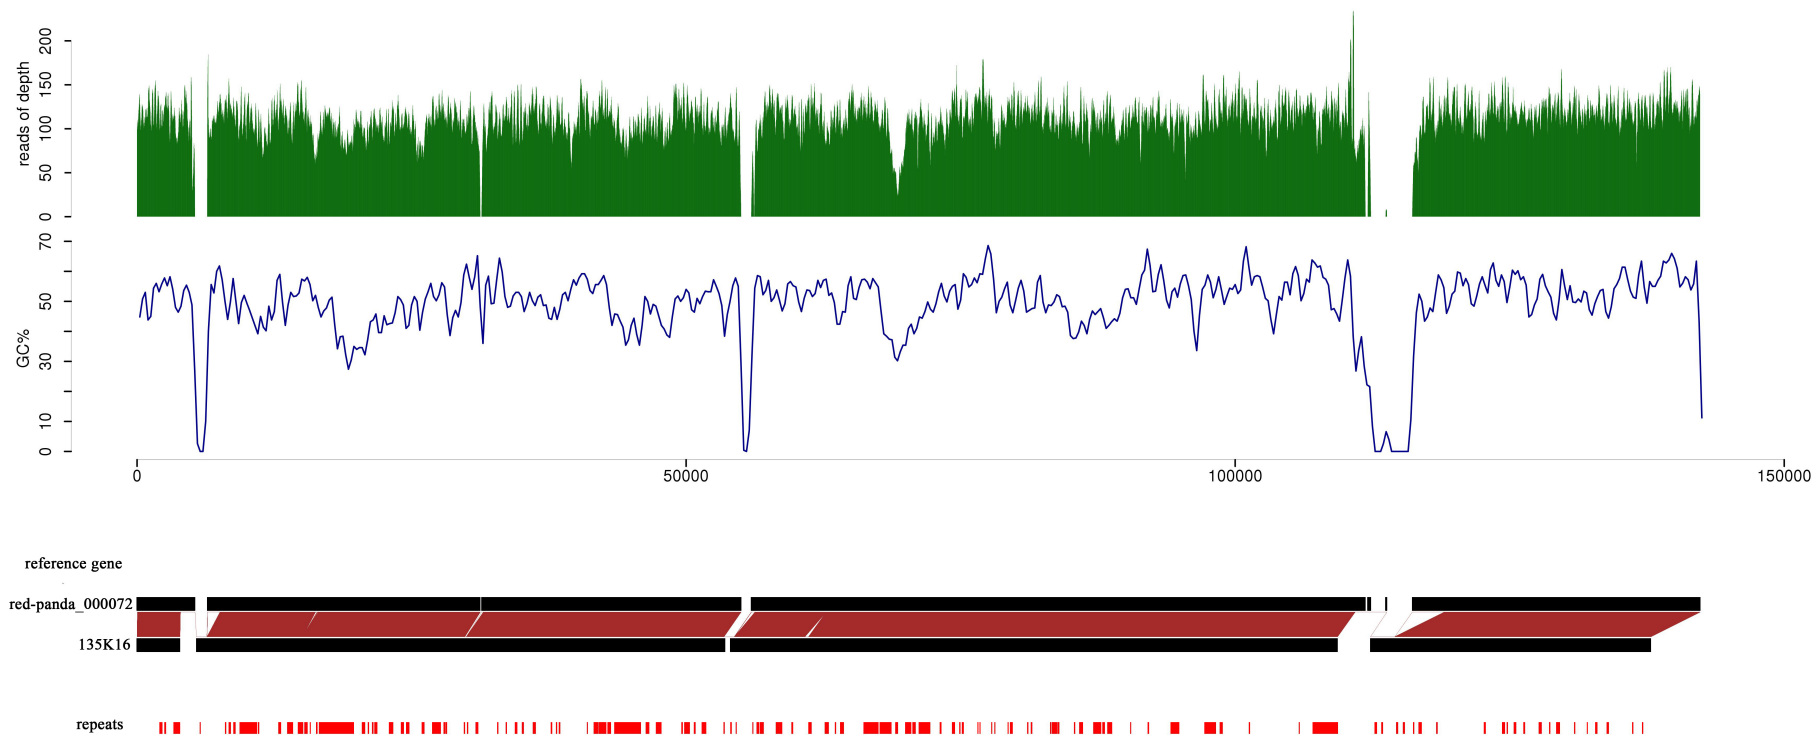

(B) 136M11

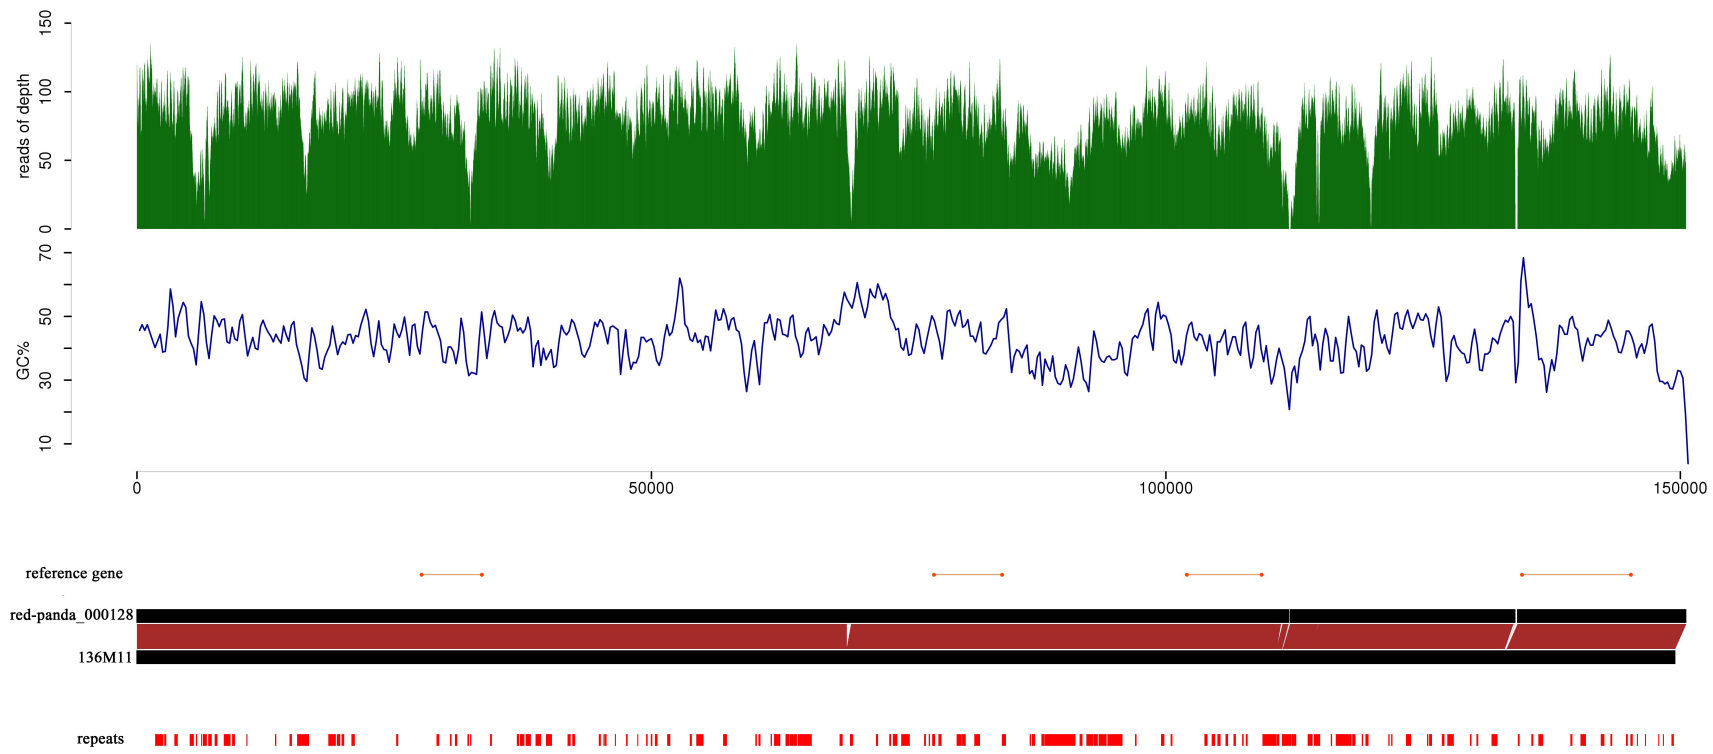



(C) 138J8

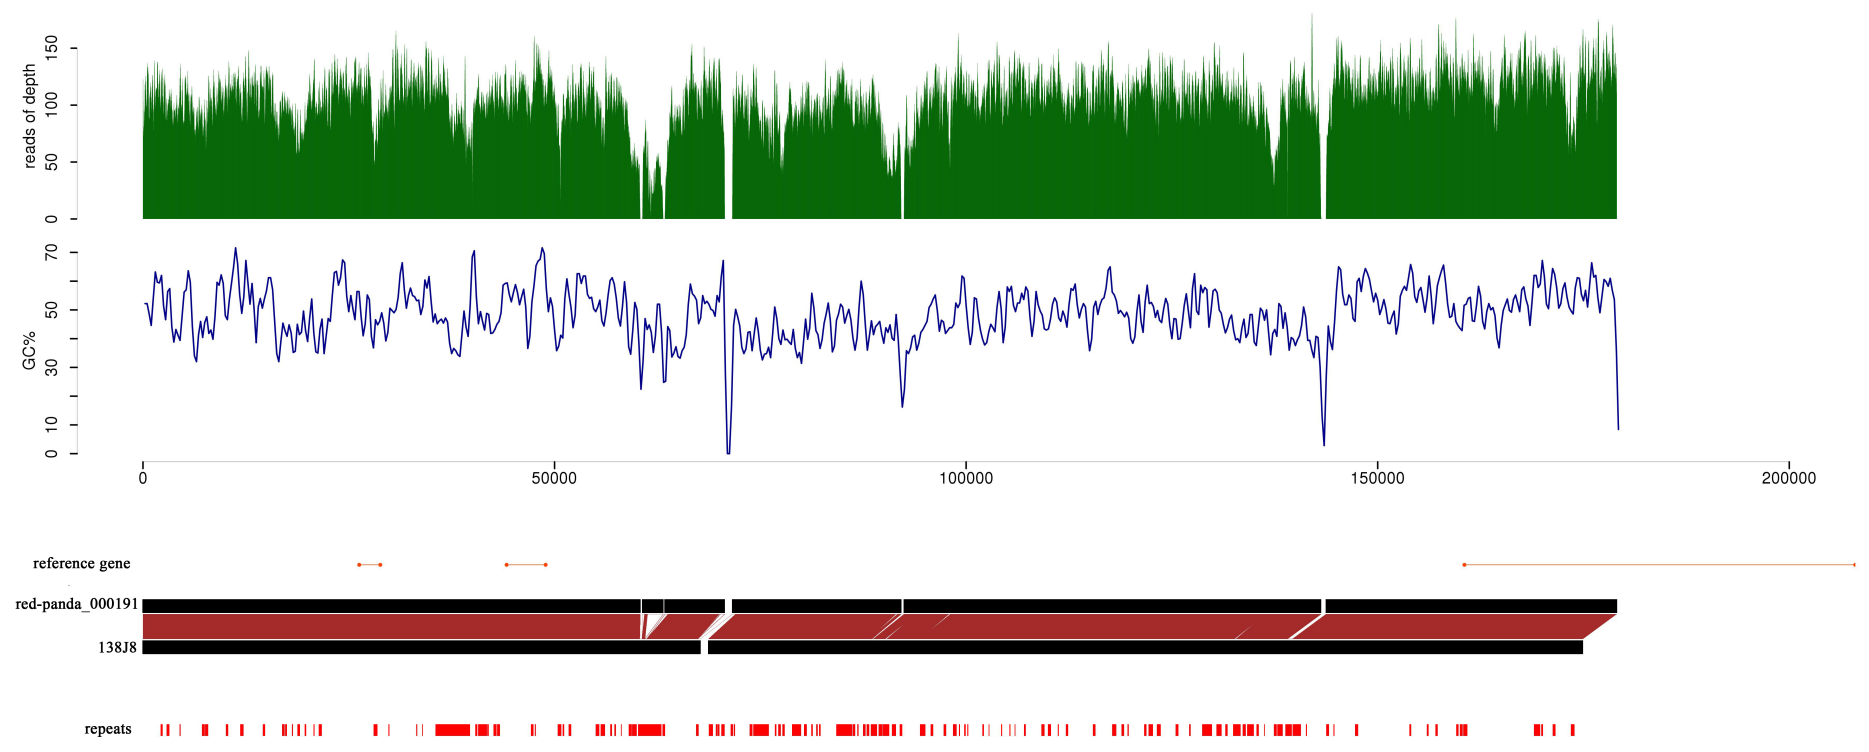

(D) 139H13

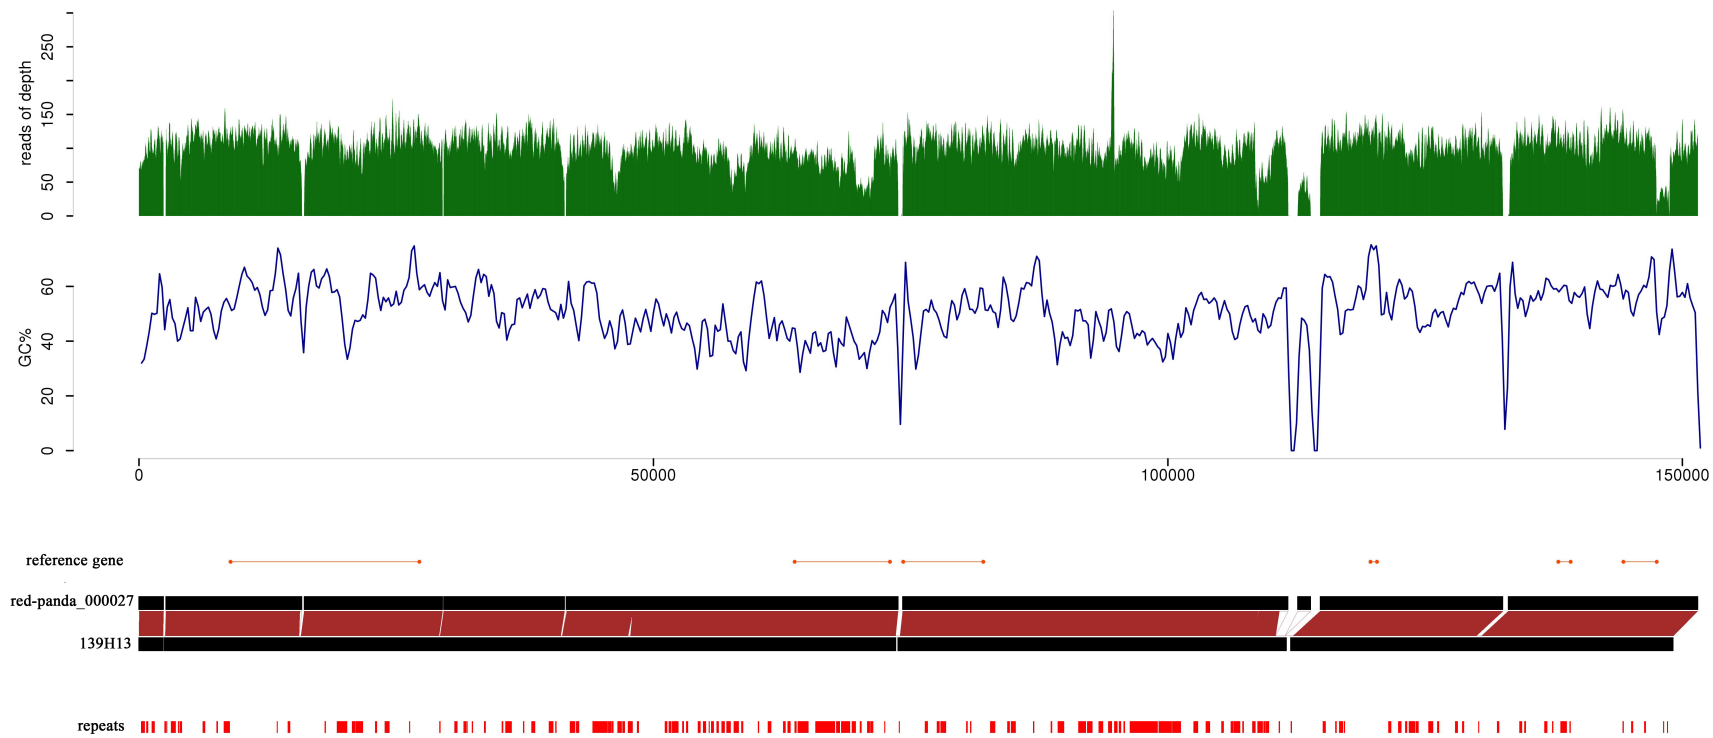

(E) 142G16

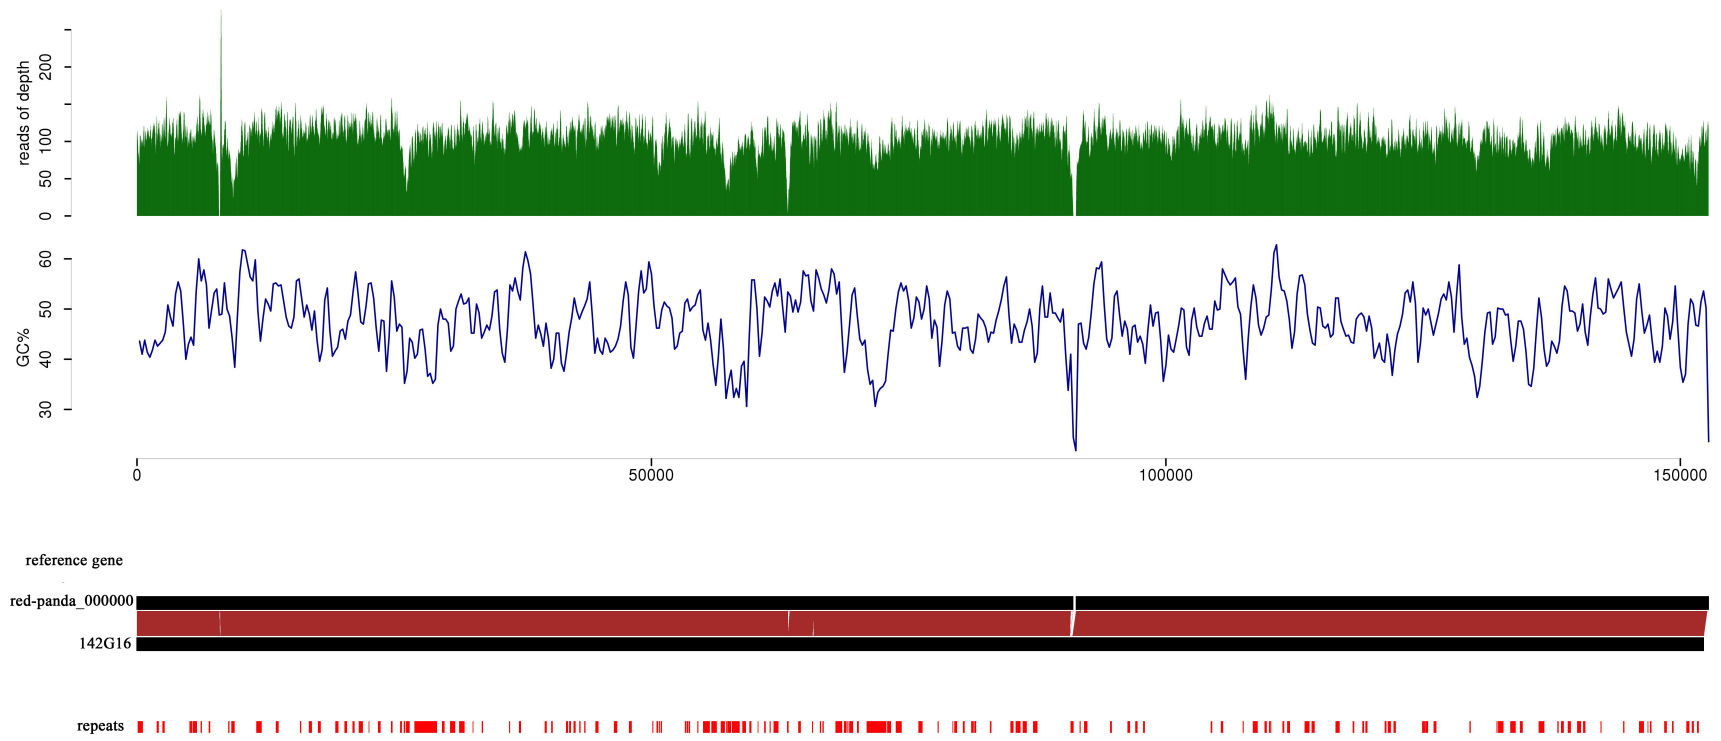

**Fig. S6.** Comparison of the assembled red panda scaffolds with five BAC clone sequences.

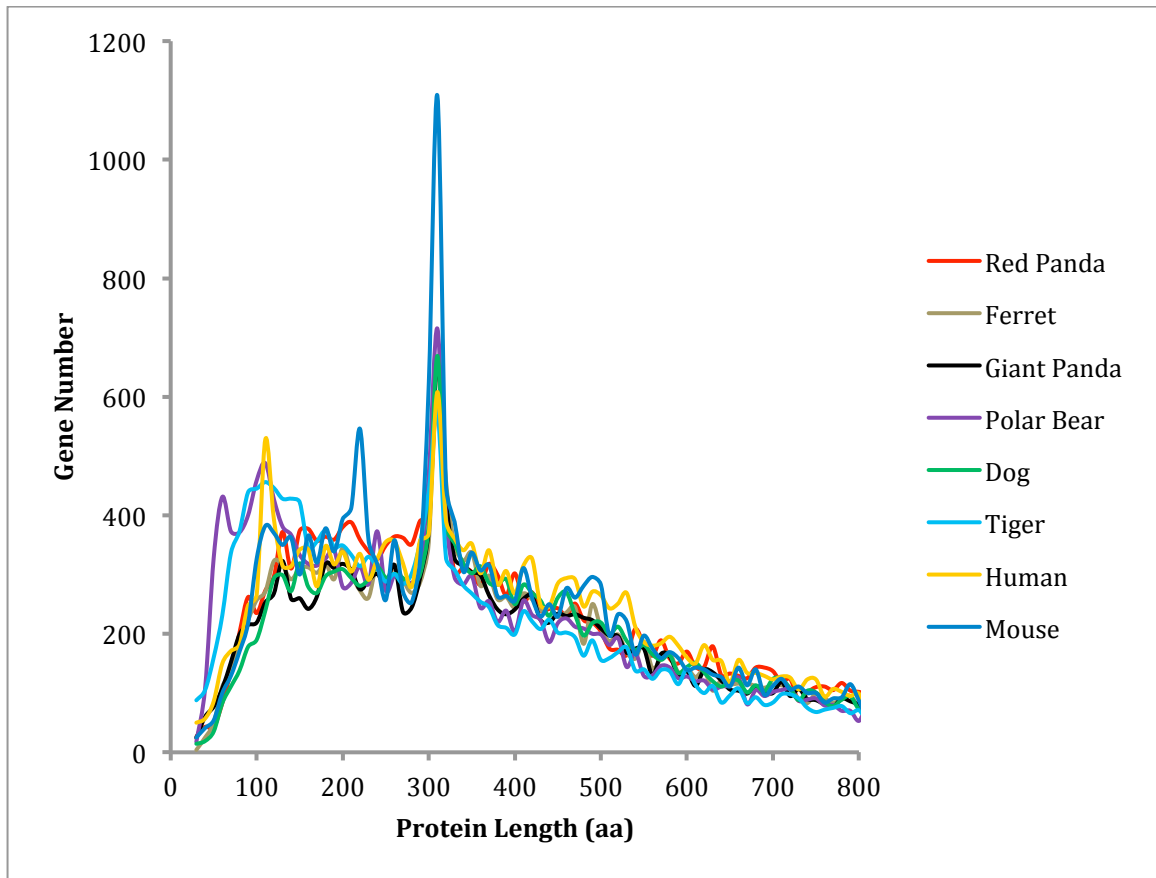

**Fig. S7.** Distribution of gene size in eight Eutherian species. The x-axis indicates gene size in amino acid length, and the y-axis represents gene number. Note that the peak around 300 amino acids (aa) corresponded to highly duplicated olfactory receptor genes in these mammalian genomes.

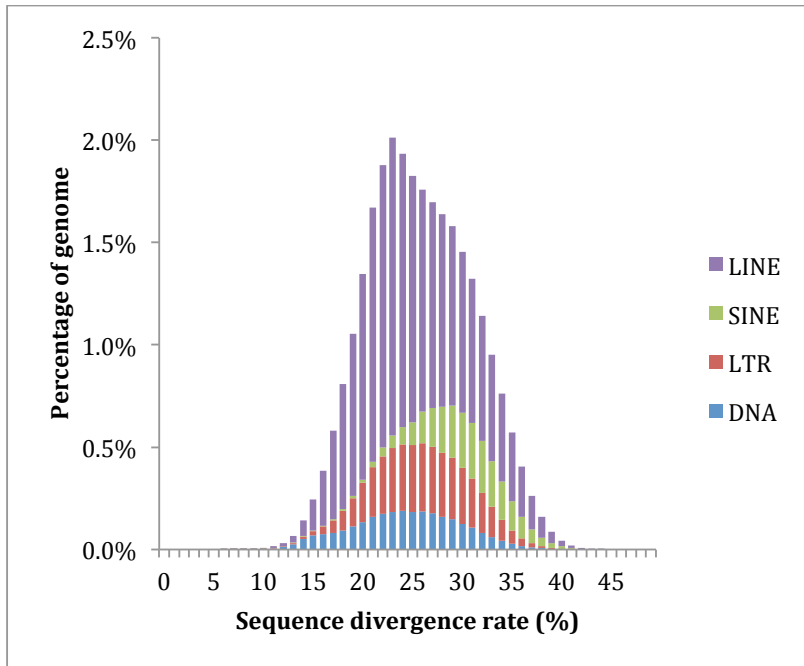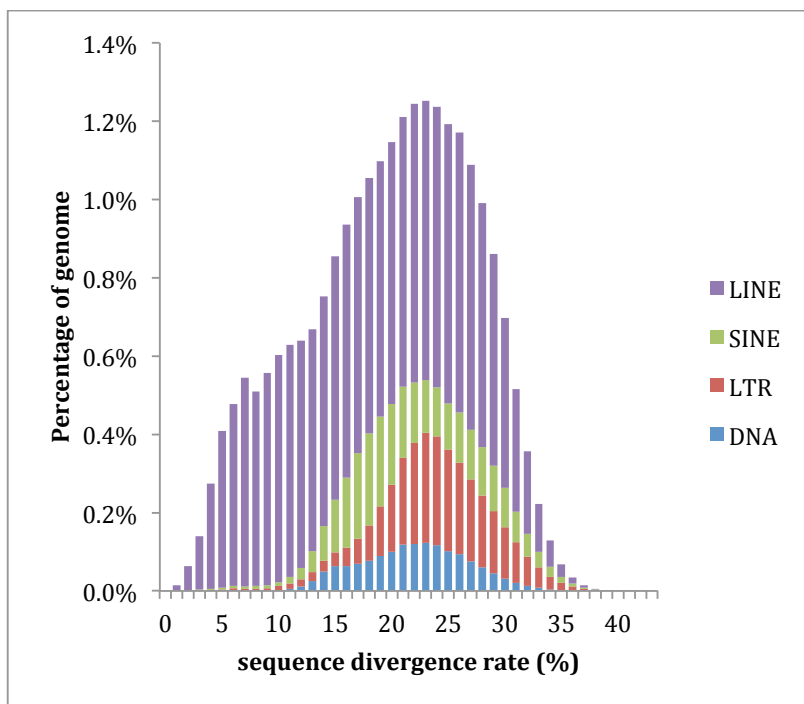

**Fig. S8.** Divergence distribution of each type of repeat elements in the red panda genome. The top panel shows repeat elements identified by RepeatMasker, and the bottom panel are repeat elements *de novo* identified by RepeatModeler.

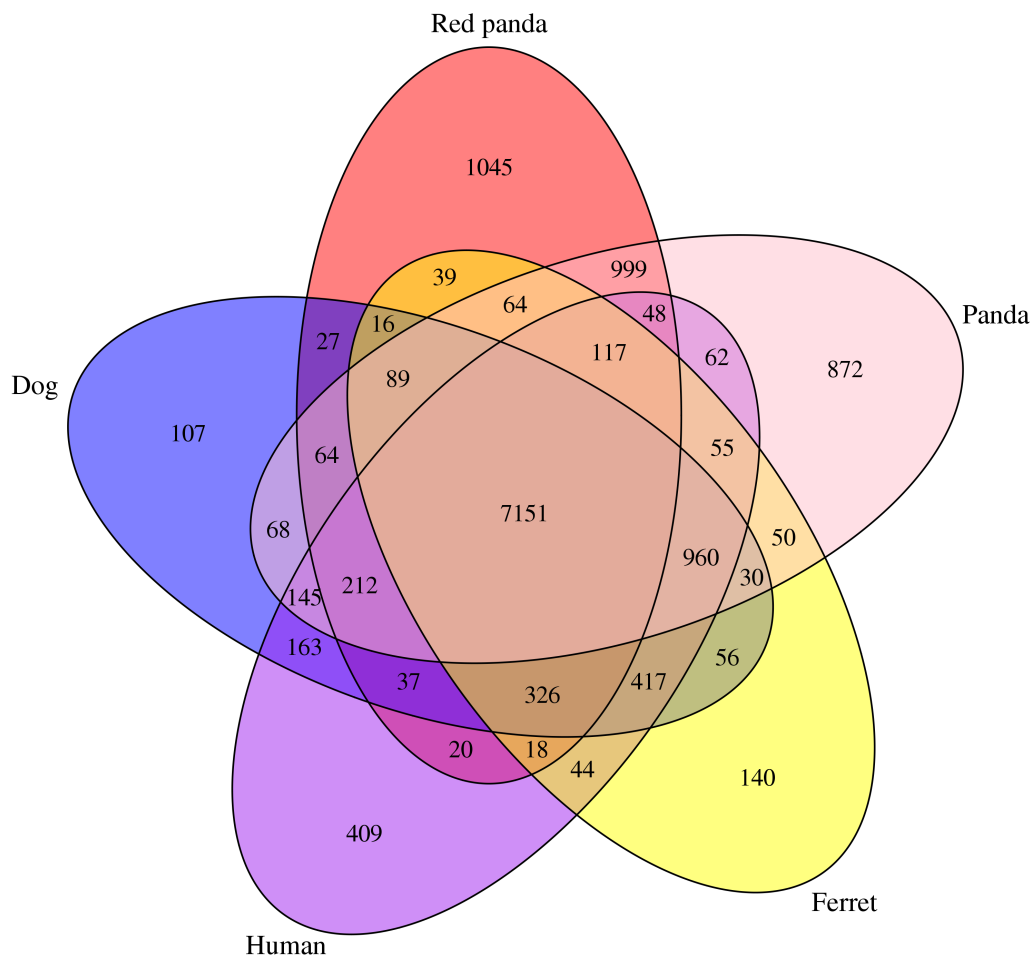

**Fig. S9.** Venn diagram of gene families shared among five Eutherian species.

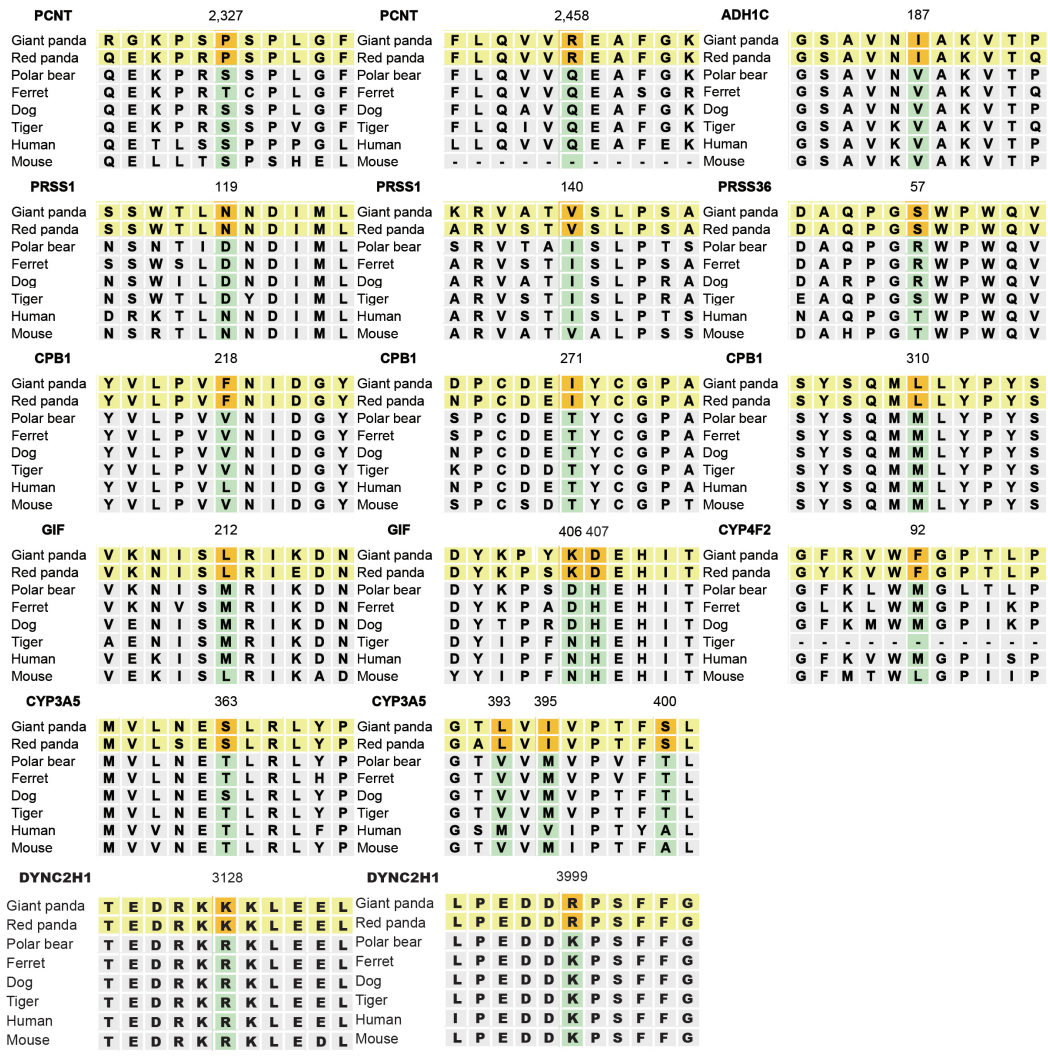

**Fig. S10.** Convergent amino acid substitutions of nine genes under adaptive convergence closely related with limb development and essential nutrient utilization. The number above the convergent site denotes the amino acid position.

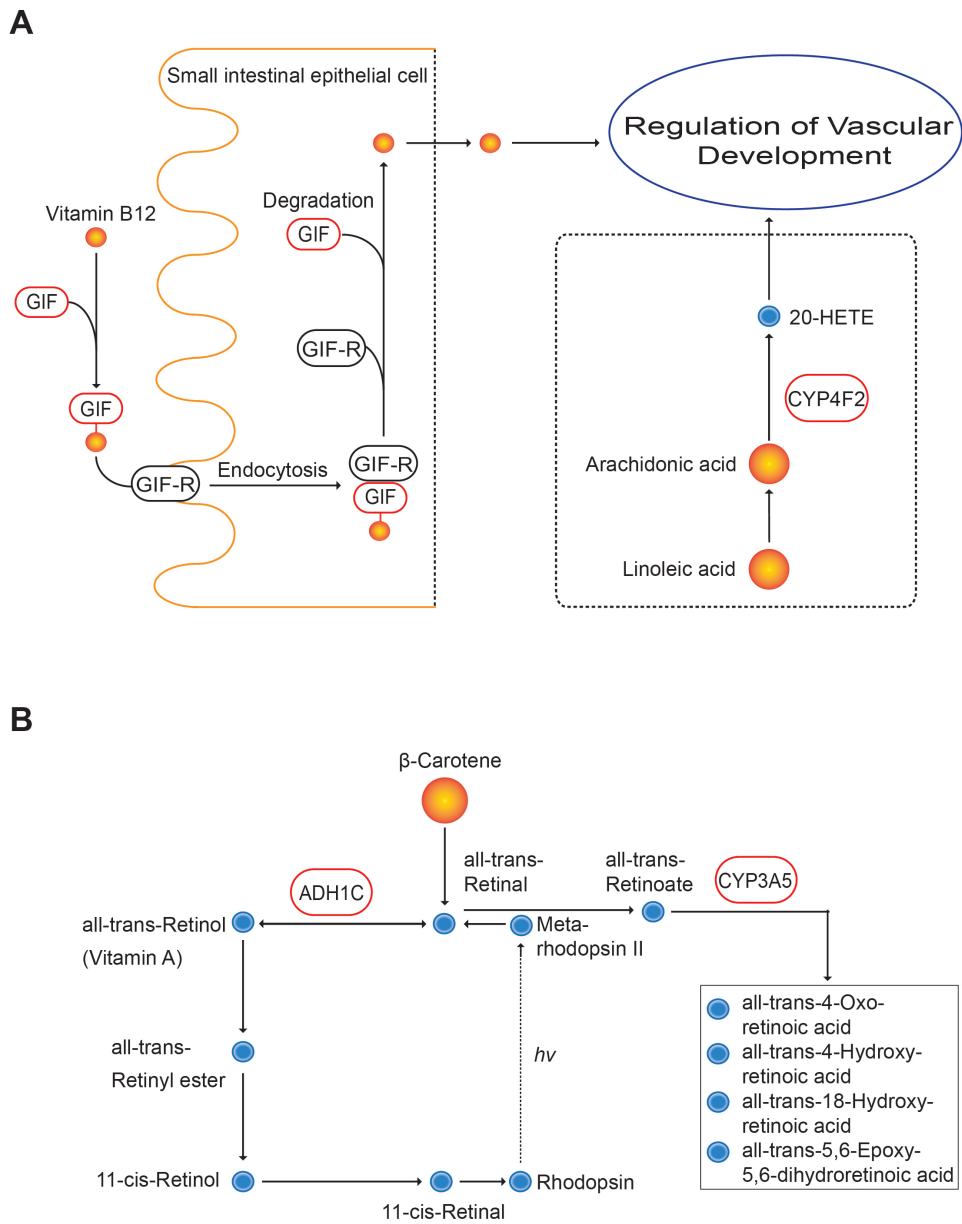

**Fig. S11.** Adaptively convergent genes involved in the metabolic pathways of essential nutrient utilization. (A) Vitamin B12 and arachidonic acid metabolism. Two adaptively convergent genes (*GIF* and *CYP4F2*) are highlighted by the red box. 20-HETE, 20-hydroxyeicosatetraenoic acid. (B)  $\beta$ -carotene and vitamin A metabolism. Two adaptively convergent genes (*ADH1C* and *CYP3A5*) are highlighted by the red box.



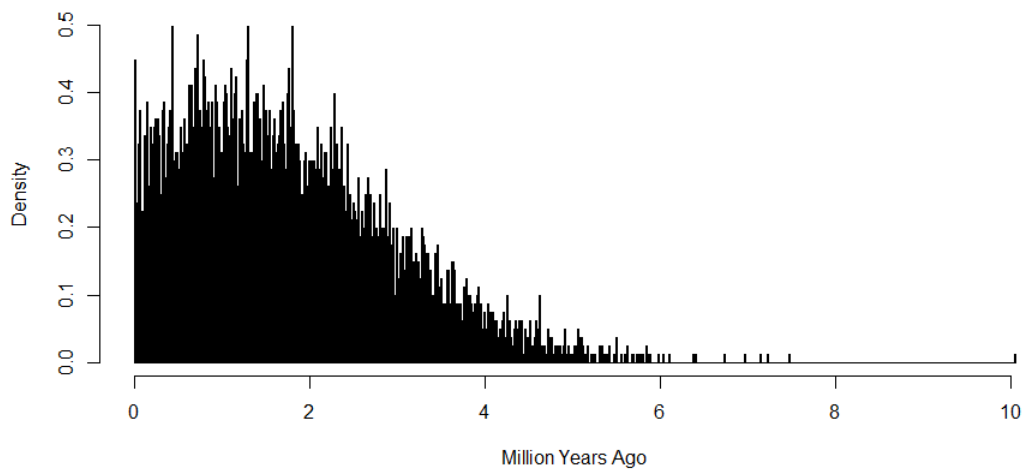

**Fig. S12.** Posterior probability distribution of the time ( $T_P$ ) at which the *TAS1R1* gene inactivated.

**Table S1. Library statistics of red panda genome sequencing.**

| <b>Insert size</b> | <b>Libraries</b> | <b>Total paired reads (M)</b> | <b>Read length</b> | <b>Sequence depth (X)</b> |
|--------------------|------------------|-------------------------------|--------------------|---------------------------|
| 180 bp             | 1                | 107.1                         | 100 bp             | 8.9                       |
| 500 bp             | 2                | 340.4                         | 100 bp             | 28.4                      |
| 750 bp             | 2                | 306.9                         | 100 bp             | 25.6                      |
| 1.5 kb             | 1                | 65.4                          | 100 bp             | 5.5                       |
| 2 kb               | 2                | 153.3                         | 100 bp             | 12.8                      |
| 3 kb               | 1                | 69.7                          | 100 bp             | 5.8                       |
| 5 kb               | 3                | 293.4                         | 100 bp             | 24.4                      |
| 8 kb               | 2                | 123.6                         | 100 bp             | 10.3                      |
| Total              | 14               | 1,459.8                       | -                  | 121.7                     |

**Table S2. Summary statistics of the red panda genome assembly.**

| <b>Red panda</b> | <b>Contig</b>    |               | <b>Scaffold</b>  |               |
|------------------|------------------|---------------|------------------|---------------|
|                  | <b>Size (bp)</b> | <b>Number</b> | <b>Size (bp)</b> | <b>Number</b> |
| N90              | 24,057           | 24,512        | 456,041          | 990           |
| N80              | 42,081           | 17,377        | 929,949          | 639           |
| N70              | 59,958           | 12,805        | 1,470,549        | 437           |
| N60              | 78,473           | 9,445         | 2,203,262        | 306           |
| N50              | 98,981           | 6,826         | 2,983,736        | 215           |
| Longest          | 905,050          | ---           | 17,255,363       | ---           |
| Total Size       | 2,309,121,644    | 69,991        | 2,343,003,074    | 11,614        |
| ≥500 bp          | 2,306,642,241    | 60,358        | 2,343,003,074    | 11,614        |
| ≥2 kb            | 2,291,277,602    | 45,096        | 2,336,940,221    | 4,739         |

**Table S3. Comparison of the assembled scaffolds with the Sanger-sequenced BAC clone sequences.** Note that the BAC library was constructed with a male red panda different from that used in genome sequencing.

| <b>BAC ID</b>  | <b>Length (bp)</b> | <b>Repeat content (%)</b> | <b>Coverage by initial contigs (%)</b> | <b>Coverage by scaffolds (%)</b> | <b>Number of single-base difference</b> | <b>Number of insertion and deletion</b> | <b>Length of insertion and deletion (bp)</b> | <b>Average read depth on scaffold</b> | <b>Rate of single-base difference (%)</b> |
|----------------|--------------------|---------------------------|----------------------------------------|----------------------------------|-----------------------------------------|-----------------------------------------|----------------------------------------------|---------------------------------------|-------------------------------------------|
| 135K16         | 132,859            | 38.41                     | 96.41                                  | 97.04                            | 228                                     | 11                                      | 14                                           | 112.91                                | 0.172                                     |
| 136M11         | 149,488            | 34.38                     | 99.3                                   | 99.85                            | 147                                     | 5                                       | 5                                            | 81.69                                 | 0.098                                     |
| 138J8          | 173,910            | 34.98                     | 98.13                                  | 98.87                            | 126                                     | 5                                       | 5                                            | 106.9                                 | 0.072                                     |
| 139H13         | 148,420            | 32.99                     | 96.84                                  | 98.09                            | 79                                      | 4                                       | 6                                            | 102.81                                | 0.053                                     |
| 142G16         | 152,267            | 30.13                     | 99.35                                  | 99.81                            | 223                                     | 9                                       | 11                                           | 106.53                                | 0.146                                     |
| <b>Average</b> | <b>151,389</b>     | <b>34.18</b>              | <b>98.01</b>                           | <b>98.73</b>                     | <b>160</b>                              | <b>7</b>                                | <b>8</b>                                     | <b>102</b>                            | <b>0.106</b>                              |

**Table S4. Statistics of the completeness of the red panda genome assembly based on 248 core eukaryotic genes (CEGs).**

|                 | <b>Number of CEGs</b> | <b>Completeness (%)</b> | <b>Total</b> | <b>Average</b> | <b>Orthology (%)</b> |
|-----------------|-----------------------|-------------------------|--------------|----------------|----------------------|
| <b>Complete</b> | 242                   | 97.58                   | 517          | 2.14           | 72.31                |
| Group 1         | 63                    | 95.45                   | 114          | 1.81           | 53.97                |
| Group 2         | 55                    | 98.21                   | 117          | 2.13           | 76.36                |
| Group 3         | 59                    | 96.72                   | 122          | 2.07           | 76.27                |
| Group 4         | 65                    | 100                     | 164          | 2.52           | 83.08                |
| <b>Partial</b>  | 248                   | 100                     | 647          | 2.61           | 82.66                |
| Group 1         | 66                    | 100                     | 152          | 2.3            | 72.73                |
| Group 2         | 56                    | 100                     | 134          | 2.39           | 82.14                |
| Group 3         | 61                    | 100                     | 158          | 2.59           | 86.89                |
| Group 4         | 65                    | 100                     | 203          | 3.12           | 89.23                |

Note: Number of CEGs, the number of ultra-conserved CEGs identified in the genome; Completeness, the percentage of CEGs presence; Total, the total number of CEGs present including putative orthologs; Average, the average number of orthologs per CEG; and Orthology, the percentage of detected CEGs that have more than one ortholog.

**Table S5. Statistics of BUSCO assessment of the red panda genome assembly and gene set prediction.**

| <b>Red panda</b>                | <b>No. of total BUSCOs</b> | <b>BUSCO mode: genome assembly</b> |                   | <b>BUSCO mode: gene set prediction</b> |                   |
|---------------------------------|----------------------------|------------------------------------|-------------------|----------------------------------------|-------------------|
|                                 |                            | <b>No. of genes</b>                | <b>Percentage</b> | <b>No. of genes</b>                    | <b>Percentage</b> |
| Complete BUSCOs                 | 3023                       | 2632                               | 87.07%            | 2533                                   | 83.79%            |
| Complete and single-copy BUSCOs | 3023                       | 2597                               | 85.91%            | 2499                                   | 82.67%            |
| Complete and duplicated BUSCOs  | 3023                       | 35                                 | 1.16%             | 34                                     | 1.12%             |
| Fragmented BUSCOs               | 3023                       | 329                                | 10.88%            | 389                                    | 12.87%            |
| Missing BUSCOs                  | 3023                       | 62                                 | 2.05%             | 101                                    | 3.34%             |

**Table S6. General statistics of predicted protein-coding genes in the red panda genome.**

| Red panda gene |                               | Number | Average gene length (bp) | Average CDS length (bp) | Average exon per gene | Average exon length (bp) | Average intron length (bp) |
|----------------|-------------------------------|--------|--------------------------|-------------------------|-----------------------|--------------------------|----------------------------|
| <i>De novo</i> | AUGUSTUS                      | 25,526 | 26,296                   | 1,262                   | 6.84                  | 184                      | 4,286                      |
|                | Fgenesh                       | 54,461 | 12,883                   | 1,271                   | 7.85                  | 162                      | 1,696                      |
| Homolog        | <i>Homo sapiens</i>           | 21,822 | 16,403                   | 1,263                   | 6.54                  | 182                      | 2,828                      |
|                | <i>Canis lupus familiaris</i> | 22,364 | 16,211                   | 1,242                   | 6.49                  | 181                      | 2,836                      |
| Final          |                               | 21,940 | 19,780                   | 1,672                   | 9.86                  | 170                      | 2,043                      |

**Table S7. Predicted non-coding RNAs in the red panda genome.**

| <b>ncRNA Type</b> | <b>Loci</b> | <b>Average length (bp)</b> | <b>Total length (bp)</b> |
|-------------------|-------------|----------------------------|--------------------------|
| tRNA              | 515         | 75                         | 38,739                   |
| rRNA              | 961         | 89                         | 85,941                   |
| C/D box           | 301         | 111                        | 33,282                   |
| H/ACA             | 117         | 203                        | 23,783                   |
| snRNA             | 1,515       | 121                        | 183,766                  |
| miRNA             | 215         | 98                         | 21,087                   |



**Table S8. Comparison of tRNA genes in eight Eutherian genomes.**

| <b>Summary of tRNA genes</b>             | <b>Red panda</b> | <b>Ferret</b> | <b>Giant panda</b> | <b>Polar bear</b> | <b>Dog</b> | <b>Tiger</b> | <b>Mouse</b> | <b>Human</b> |
|------------------------------------------|------------------|---------------|--------------------|-------------------|------------|--------------|--------------|--------------|
| tRNAs decoding Standard 20 AA            | 512              | 561           | 398                | 620               | 404        | 505          | 378          | 545          |
| Selenocysteine tRNAs (TCA)               | 3                | 0             | 0                  | 0                 | 1          | 15           | 0            | 1            |
| Possible suppressor tRNAs (CTA,TTA)      | 0                | 1             | 1                  | 1                 | 1          | 2            | 0            | 2            |
| tRNAs with undetermined/unknown isotypes | 0                | 1             | 1                  | 0                 | 0          | 0            | 0            | 2            |
| Predicted pseudogenes                    | 0                | 0             | 0                  | 0                 | 0          | 0            | 0            | 0            |
| <b>Total tRNAs</b>                       | <b>515</b>       | <b>563</b>    | <b>400</b>         | <b>621</b>        | <b>406</b> | <b>522</b>   | <b>378</b>   | <b>550</b>   |

**Table S9. Detailed composition of repeat elements in the red panda genome.**

|                                            | <b>Number</b>    | <b>Length (bp)</b> | <b>Percent (%)</b> |
|--------------------------------------------|------------------|--------------------|--------------------|
| <b>Class I elements (Retroelements)</b>    | <b>2,495,672</b> | <b>686,543,916</b> | <b>29.73</b>       |
| <b>LTR Retrotransposon</b>                 | <b>368,917</b>   | <b>114,519,427</b> | <b>4.96</b>        |
| LTR/Copia                                  | 11               | 879                | 0.00               |
| LTR/Delta                                  | 3                | 321                | 0.00               |
| LTR/ERV1                                   | 64,286           | 20,369,905         | 0.88               |
| LTR/ERVK                                   | 1,851            | 780,731            | 0.03               |
| LTR/ERVL                                   | 110,057          | 39,226,191         | 1.70               |
| LTR/ERVL-MaLR                              | 171,712          | 49,628,108         | 2.15               |
| LTR/Foamy                                  | 2                | 183                | 0.00               |
| LTR/Gypsy                                  | 14,511           | 3,030,554          | 0.13               |
| LTR/Lenti                                  | 1                | 27                 | 0.00               |
| LTR/Pao                                    | 2                | 305                | 0.00               |
| unclassified LTR                           | 6,481            | 1,482,223          | 0.06               |
| <b>non-LTR Retrotransposon</b>             | <b>2,126,755</b> | <b>572,024,489</b> | <b>24.77</b>       |
| <b>LINE</b>                                | <b>1,502,377</b> | <b>485,036,122</b> | <b>21.01</b>       |
| LINE/CR1                                   | 46,511           | 8,468,785          | 0.37               |
| LINE/Dong-R4                               | 348              | 77,451             | 0.00               |
| LINE/Jockey                                | 17               | 1,746              | 0.00               |
| LINE/L1                                    | 1,104,020        | 397,311,977        | 17.21              |
| LINE/L1-Tx1                                | 75               | 7,415              | 0.00               |
| LINE/L2                                    | 336,654          | 76,099,498         | 3.30               |
| LINE/Penelope                              | 613              | 62,672             | 0.00               |
| LINE/R2                                    | 13               | 780                | 0.00               |
| LINE/RTE-BovB                              | 4,274            | 683,455            | 0.03               |
| LINE/RTE-X                                 | 9,812            | 2,319,071          | 0.10               |
| other LINE                                 | 40               | 3,272              | 0.00               |
| <b>SINE</b>                                | <b>624,378</b>   | <b>86,988,367</b>  | <b>3.77</b>        |
| SINE/5S-Deu-L2                             | 1,749            | 205,906            | 0.01               |
| SINE/Alu                                   | 3                | 325                | 0.00               |
| SINE/MIR                                   | 453,808          | 66,415,564         | 2.88               |
| SINE/tRNA                                  | 164,650          | 19,824,586         | 0.86               |
| SINE/tRNA-Deu                              | 392              | 50,023             | 0.00               |
| SINE/tRNA-RTE                              | 3,743            | 489,222            | 0.02               |
| unclassified SINE                          | 33               | 2,741              | 0.00               |
| <b>Class II elements (DNA Transposons)</b> | <b>323,889</b>   | <b>65,643,081</b>  | <b>2.84</b>        |
| <b>DNA Transposon</b>                      | <b>321,953</b>   | <b>65,278,493</b>  | <b>2.83</b>        |
| DNA/CMC-EnSpm                              | 4,146            | 312,598            | 0.01               |
| DNA/MULE-MuDR                              | 133              | 18,075             | 0.00               |
| DNA/PIF-Harbinger                          | 20               | 2,040              | 0.00               |

|                              |                  |                    |              |
|------------------------------|------------------|--------------------|--------------|
| DNA/PiggyBac                 | 602              | 205,966            | 0.01         |
| DNA/TcMar                    | 357              | 67,036             | 0.00         |
| DNA/TcMar-Mariner            | 4,349            | 584,599            | 0.03         |
| DNA/TcMar-Pogo               | 31               | 3,702              | 0.00         |
| DNA/TcMar-Tc2                | 6,309            | 1,412,390          | 0.06         |
| DNA/TcMar-Tigger             | 52,091           | 15,253,280         | 0.66         |
| DNA/hAT                      | 7,981            | 1,230,074          | 0.05         |
| DNA/hAT-Ac                   | 1,781            | 209,624            | 0.01         |
| DNA/hAT-Blackjack            | 15,412           | 2,899,673          | 0.13         |
| DNA/hAT-Charlie              | 189,583          | 35,228,987         | 1.53         |
| DNA/hAT-Tag1                 | 131              | 17,062             | 0.00         |
| DNA/hAT-Tip100               | 34,448           | 7,196,685          | 0.31         |
| other DNA Transposon         | 31               | 6,049              | 0.00         |
| unclassified DNA Transposon  | 4,548            | 630,653            | 0.03         |
| <b>RC/Helitron</b>           | <b>1,936</b>     | <b>364,588</b>     | <b>0.02</b>  |
| <b>Satellite</b>             | <b>1,362</b>     | <b>458,276</b>     | <b>0.02</b>  |
| unclassified Satellite       | 1,352            | 457,203            | 0.02         |
| Satellite/acro               | 1                | 270                | 0.00         |
| Satellite/centr              | 5                | 275                | 0.00         |
| Satellite/telo               | 4                | 528                | 0.00         |
| <b>Low_complexity</b>        | <b>366,791</b>   | <b>70,158,576</b>  | <b>3.04</b>  |
| <b>Simple_repeat</b>         | <b>918,727</b>   | <b>99,777,534</b>  | <b>4.32</b>  |
| <b>TRF</b>                   | <b>97,368</b>    | <b>8,309,904</b>   | <b>0.36</b>  |
| <b>Other repeats</b>         | <b>77,087</b>    | <b>642,045</b>     | <b>0.03</b>  |
| RNA                          | 611              | 126,511            | 0.01         |
| Retroposon/SVA               | 2                | 121                | 0.00         |
| rRNA                         | 1,492            | 149,335            | 0.01         |
| scRNA                        | 60               | 4,740              | 0.00         |
| snRNA                        | 4,096            | 309,867            | 0.01         |
| srpRNA                       | 57               | 12,732             | 0.00         |
| tRNA                         | 515              | 38,739             | 0.00         |
| <b>Unknown repeats</b>       | <b>160,417</b>   | <b>20,586,452</b>  | <b>0.89</b>  |
| <b>Total repeat elements</b> | <b>4,371,059</b> | <b>952,119,784</b> | <b>41.23</b> |

**Table S10. Detailed composition of repeat elements in the giant panda genome.**

|                                            | <b>Number</b>    | <b>Length (bp)</b> | <b>Percent (%)</b> |
|--------------------------------------------|------------------|--------------------|--------------------|
| <b>Class I elements (Retroelements)</b>    | <b>2,730,984</b> | <b>758,875,315</b> | <b>31.86</b>       |
| <b>LTR Retrotransposon</b>                 | <b>395,461</b>   | <b>124,969,510</b> | <b>5.25</b>        |
| LTR/Copia                                  | 6                | 579                | 0.00               |
| LTR/ERV                                    | 79               | 13,232             | 0.00               |
| LTR/ERV1                                   | 67,493           | 21,680,311         | 0.91               |
| LTR/ERVK                                   | 338              | 138,027            | 0.01               |
| LTR/ERVL                                   | 118,579          | 43,112,696         | 1.81               |
| LTR/ERVL-MaLR                              | 185,329          | 54,863,493         | 2.30               |
| LTR/Gypsy                                  | 16,573           | 3,554,259          | 0.15               |
| LTR/Lenti                                  | 2                | 448                | 0.00               |
| LTR/Pao                                    | 3                | 838                | 0.00               |
| unclassified LTR                           | 7,059            | 1,605,627          | 0.07               |
| <b>non-LTR Retrotransposon</b>             | <b>2,335,523</b> | <b>633,905,805</b> | <b>26.62</b>       |
| <b>LINE</b>                                | <b>1,562,713</b> | <b>516,958,103</b> | <b>21.71</b>       |
| LINE/CR1                                   | 51,065           | 9,345,302          | 0.39               |
| LINE/Dong-R4                               | 375              | 86,990             | 0.00               |
| LINE/I                                     | 37               | 3,677              | 0.00               |
| LINE/Jockey                                | 48               | 3,990              | 0.00               |
| LINE/L1                                    | 1,124,247        | 418,764,418        | 17.58              |
| LINE/L1-Tx1                                | 174              | 15,405             | 0.00               |
| LINE/L2                                    | 368,073          | 84,558,670         | 3.55               |
| LINE/Penelope                              | 2,640            | 753,476            | 0.03               |
| LINE/R1                                    | 15               | 1,112              | 0.00               |
| LINE/R2                                    | 25               | 1,740              | 0.00               |
| LINE/RTE                                   | 49               | 3,265              | 0.00               |
| LINE/RTE-BovB                              | 4,694            | 758,010            | 0.03               |
| LINE/RTE-X                                 | 11,177           | 2,653,966          | 0.11               |
| other LINE                                 | 94               | 8,082              | 0.00               |
| <b>SINE</b>                                | <b>772,810</b>   | <b>116,947,702</b> | <b>4.91</b>        |
| SINE/5S-Deu-L2                             | 1,758            | 198,072            | 0.01               |
| SINE/Alu                                   | 4                | 295                | 0.00               |
| SINE/Lys                                   | 270,737          | 43,423,846         | 1.82               |
| SINE/MIR                                   | 494,275          | 72,550,701         | 3.05               |
| SINE/tRNA                                  | 1,458            | 193,364            | 0.01               |
| SINE/tRNA-Deu                              | 433              | 51,716             | 0.00               |
| SINE/tRNA-RTE                              | 4,117            | 527,450            | 0.02               |
| unclassified SINE                          | 28               | 2,258              | 0.00               |
| <b>Class II elements (DNA Transposons)</b> | <b>346,645</b>   | <b>71,777,977</b>  | <b>3.01</b>        |
| <b>DNA Transposon</b>                      | <b>344,932</b>   | <b>71,395,420</b>  | <b>3.00</b>        |

|                              |                  |                    |              |
|------------------------------|------------------|--------------------|--------------|
| DNA/Chapaev                  | 608              | 55,708             | 0.00         |
| DNA/MULE-MuDR                | 164              | 15,579             | 0.00         |
| DNA/PIF-Harbinger            | 19               | 2,667              | 0.00         |
| DNA/PiggyBac                 | 626              | 221,391            | 0.01         |
| DNA/TcMar                    | 479              | 87,965             | 0.00         |
| DNA/TcMar-Mariner            | 4,810            | 655,764            | 0.03         |
| DNA/TcMar-Pogo               | 33               | 3,912              | 0.00         |
| DNA/TcMar-Tc2                | 6,714            | 1,531,326          | 0.06         |
| DNA/TcMar-Tigger             | 54,930           | 16,589,787         | 0.70         |
| DNA/Transib                  | 627              | 48,536             | 0.00         |
| DNA/hAT                      | 8,928            | 1,387,706          | 0.06         |
| DNA/hAT-Ac                   | 1,772            | 218,907            | 0.01         |
| DNA/hAT-Blackjack            | 16,972           | 3,157,905          | 0.13         |
| DNA/hAT-Charlie              | 205,719          | 38,764,862         | 1.63         |
| DNA/hAT-Tag1                 | 132              | 16,811             | 0.00         |
| DNA/hAT-Tip100               | 37,475           | 7,947,993          | 0.33         |
| other DNA                    | 51               | 9,939              | 0.00         |
| unclassified DNA Transposon  | 4,873            | 678,662            | 0.03         |
| <b>RC/Helitron</b>           | <b>1,713</b>     | <b>382,557</b>     | <b>0.02</b>  |
| <b>Satellite</b>             | <b>286</b>       | <b>55,452</b>      | <b>0.00</b>  |
| unclassified Satellite       | 272              | 51,346             | 0.00         |
| Satellite/centr              | 9                | 2,964              | 0.00         |
| Satellite/telo               | 5                | 1,142              | 0.00         |
| <b>Low_complexity</b>        | <b>282,569</b>   | <b>48,218,373</b>  | <b>2.02</b>  |
| <b>Simple_repeat</b>         | <b>823,991</b>   | <b>85,609,513</b>  | <b>3.59</b>  |
| <b>TRF</b>                   | <b>97,775</b>    | <b>10,626,786</b>  | <b>0.45</b>  |
| <b>Other repeats</b>         | <b>76,677</b>    | <b>493, 465</b>    | <b>0.02</b>  |
| RNA                          | 626              | 125,422            | 0.01         |
| Retroposon/SVA               | 6                | 16,508             | 0.00         |
| rRNA                         | 883              | 86,752             | 0.00         |
| scRNA                        | 60               | 5,272              | 0.00         |
| snRNA                        | 2,450            | 209,515            | 0.01         |
| srpRNA                       | 44               | 8,949              | 0.00         |
| tRNA                         | 400              | 41,047             | 0.00         |
| <b>Unknown repeats</b>       | <b>22,412</b>    | <b>7,615,908</b>   | <b>0.32</b>  |
| <b>Total repeat elements</b> | <b>4,309,131</b> | <b>983,272,789</b> | <b>41.29</b> |

**Table S11. Comparison of repeat elements in the red panda, giant panda, dog, and human genomes.**

|              | <b>Red panda</b>   |              | <b>Giant panda</b> |              | <b>Dog</b>           |              | <b>Human</b>         |              |
|--------------|--------------------|--------------|--------------------|--------------|----------------------|--------------|----------------------|--------------|
|              | <b>Length (bp)</b> | <b>%</b>     | <b>Length (bp)</b> | <b>%</b>     | <b>Length (bp)</b>   | <b>%</b>     | <b>Length (bp)</b>   | <b>%</b>     |
| DNA          | 65,643,081         | 2.84         | 71,777,977         | 3.01         | 64,889,929           | 2.71         | 103,876,654          | 3.59         |
| LINE         | 485,036,122        | 21.01        | 516,958,103        | 21.71        | 456,223,872          | 19.07        | 640,619,088          | 22.11        |
| LTR          | 114,519,427        | 4.96         | 124,969,510        | 5.25         | 117,146,888          | 4.9          | 271,241,060          | 9.36         |
| SINE         | 86,988,367         | 3.77         | 116,947,702        | 4.91         | 113,239,262          | 4.73         | 391,625,775          | 13.52        |
| Other        | 179,346,335        | 7.77         | 145,003,589        | 6.09         | 249,825,363          | 10.44        | 84,570,903           | 2.92         |
| Unknown      | 20,586,452         | 0.89         | 7,615,908          | 0.32         | 2,495,596            | 0.1          | 1,355,877            | 0.05         |
| <b>Total</b> | <b>952,119,784</b> | <b>41.23</b> | <b>983,272,789</b> | <b>41.29</b> | <b>1,003,820,910</b> | <b>41.95</b> | <b>1,493,289,357</b> | <b>51.54</b> |

**Table S12. Sequencing data used for the giant panda genome assembly.**

| <b>Insert size</b>       | <b>Libraries</b> | <b>Total paired reads (M)</b> | <b>Read length</b> | <b>Sequence depth (X)</b> |
|--------------------------|------------------|-------------------------------|--------------------|---------------------------|
| 500 bp <sup>*</sup>      | 2                | 438.6                         | 100 bp             | 36.6                      |
| 750 bp <sup>*</sup>      | 2                | 543                           | 100 bp             | 45.3                      |
| 1.7-2.8 kb <sup>+</sup>  | 5                | 198                           | 71 bp              | 11.7                      |
| 3.7-7.5 kb <sup>+</sup>  | 4                | 245                           | 38 bp              | 7.8                       |
| 9.2-12.3 kb <sup>+</sup> | 2                | 124                           | 35 bp              | 3.6                       |
| <b>Total</b>             | <b>15</b>        | <b>1,548.6</b>                | <b>-</b>           | <b>105</b>                |

<sup>\*</sup>Library prepared in this project; <sup>+</sup>Mate-pair dataset downloaded from ref. 2.

**Table S13. Summary statistics of the giant panda genome assembly.**

| <b>Giant panda</b> | <b>Contig</b>    |               | <b>Scaffold</b>  |               |
|--------------------|------------------|---------------|------------------|---------------|
|                    | <b>Size (bp)</b> | <b>Number</b> | <b>Size (bp)</b> | <b>Number</b> |
| N90                | 23,145           | 21,170        | 1,993,038        | 255           |
| N80                | 48,601           | 14,264        | 4,389,424        | 179           |
| N70                | 72,966           | 10,297        | 6,777,671        | 134           |
| N60                | 98,258           | 7,494         | 8,172,382        | 102           |
| N50                | 126,709          | 5,361         | 9,947,519        | 75            |
| Longest            | 1,471,649        | ---           | 32,438,596       | ---           |
| Total Size         | 2,381,719,198    | 107,028       | 2,428,763,181    | 57,465        |
| ≥500 bp            | 2,377,554,755    | 89,491        | 2,428,763,181    | 57,465        |
| ≥2 kb              | 2,333,013,924    | 46,804        | 2,385,084,718    | 15,123        |



**Table S14. General statistics of predicted protein-coding genes in the giant panda genome.**

| Giant panda gene |                               | Number | Average gene length (bp) | Average CDS length (bp) | Average exon per gene | Average exon length (bp) | Average intron length (bp) |
|------------------|-------------------------------|--------|--------------------------|-------------------------|-----------------------|--------------------------|----------------------------|
| <i>De novo</i>   | AUGUSTUS                      | 25,046 | 24,792                   | 1,251                   | 6.85                  | 183                      | 4,024                      |
|                  | Fgenesh                       | 49,374 | 12,002                   | 1,153                   | 6.73                  | 171                      | 1,892                      |
| Homolog          | <i>Homo sapiens</i>           | 21,697 | 16,047                   | 1,236                   | 6.47                  | 180                      | 2,817                      |
|                  | <i>Canis lupus familiaris</i> | 22,296 | 16,548                   | 1,211                   | 6.40                  | 179                      | 2,830                      |
| Final            |                               | 23,371 | 17,705                   | 1,453                   | 8.32                  | 175                      | 2,219                      |

**Table S15. Genome version information and statistics of protein-coding genes for eight Eutherian species used in this study including giant and red pandas.**

| <b>Species</b> | <b>Latin name</b>             | <b>Version</b>  | <b>Number of unique gene</b> | <b>Average gene length (bp)</b> | <b>Average CDS length (bp)</b> | <b>Average exon per gene</b> | <b>Average exon length (bp)</b> | <b>Average intron length (bp)</b> |
|----------------|-------------------------------|-----------------|------------------------------|---------------------------------|--------------------------------|------------------------------|---------------------------------|-----------------------------------|
| Human          | <i>Homo sapiens</i>           | GRCh37.71       | 23,145                       | 45,165                          | 1,619                          | 9                            | 174                             | 5,233                             |
| Mouse          | <i>Mus musculus</i>           | GRCm38.71       | 22,796                       | 35,595                          | 1,557                          | 9                            | 180                             | 4,437                             |
| Dog            | <i>Canis lupus familiaris</i> | CanFam3.1.71    | 19,856                       | 38,418                          | 1,641                          | 10                           | 172                             | 4,313                             |
| Ferret         | <i>Mustela putorius furo</i>  | MusPutFur1.0.72 | 19,910                       | 38,722                          | 1,602                          | 10                           | 169                             | 4,369                             |
| Tiger          | <i>Panthera tigris</i>        | PanTig1.0       | 20,226                       | 35,544                          | 1,377                          | 8                            | 170                             | 4,818                             |
| Polar bear     | <i>Ursus maritimus</i>        | UrsMar1.0       | 21,142                       | 31,451                          | 1,457                          | 9                            | 169                             | 3,930                             |
| Giant panda    | <i>Ailuropoda melanoleuca</i> | This study      | 23,371                       | 17,705                          | 1,453                          | 8                            | 175                             | 2,219                             |
| Red panda      | <i>Ailurus fulgens</i>        | This study      | 21,940                       | 19,780                          | 1,672                          | 10                           | 170                             | 2,043                             |

**Table S16. Different test strategies and the identified gene number in positive selection analysis.**

| <b>Strategy No.</b> | <b>Species of interest to be selected as foreground branch</b> | <b>All the species used in positive selection analysis</b> | <b>Number of positively selected gene</b> |
|---------------------|----------------------------------------------------------------|------------------------------------------------------------|-------------------------------------------|
| 1                   | Giant panda                                                    | Giant panda & polar bear                                   | 155                                       |
| 2                   | Red panda                                                      | Red panda & ferret                                         | 79                                        |
| 3                   | Giant panda & red panda                                        | Red panda, giant panda, polar bear & ferret                | 128                                       |
| 4                   | Giant panda                                                    | Giant panda, polar bear, ferret, tiger & dog               | 55                                        |
| 5                   | Red panda                                                      | Red panda, polar bear, ferret, tiger & dog                 | 143                                       |
| 6                   | Giant panda & red panda                                        | Red panda, giant panda, polar bear, ferret, tiger & dog    | 102                                       |
| Total               | ---                                                            | ---                                                        | 416                                       |

**Table S17. Significantly enriched KEGG pathways for 416 positively selected genes in giant and red pandas, using the 14,254 genes as the reference. The KEGG pathways associated with the utilization of essential nutrients are in red italics.**

| KEGG ID        | KEGG Pathway                                    | Observed number of genes | Expected number of genes | <i>P-value</i>     |
|----------------|-------------------------------------------------|--------------------------|--------------------------|--------------------|
| <i>ko04974</i> | <i>Protein digestion and absorption</i>         | <i>14</i>                | <i>2.49418</i>           | <i>1.59745E-07</i> |
| ko04514        | Cell adhesion molecules (CAMs)                  | 8                        | 3.0517                   | 0.0114151          |
| ko05150        | Staphylococcus aureus infection                 | 4                        | 1.0857                   | 0.0224824          |
| ko04512        | ECM-receptor interaction                        | 6                        | 2.20074                  | 0.0226371          |
| ko05146        | Amoebiasis                                      | 7                        | 2.84629                  | 0.0239012          |
| <i>ko00740</i> | <i>Riboflavin metabolism</i>                    | <i>2</i>                 | <i>0.264089</i>          | <i>0.0269741</i>   |
| ko05416        | Viral myocarditis                               | 4                        | 1.34979                  | 0.0453198          |
| ko00604        | Glycosphingolipid biosynthesis - ganglio series | 2                        | 0.352119                 | 0.0466749          |
| ko04380        | Osteoclast differentiation                      | 7                        | 3.28644                  | 0.0467302          |
| ko04640        | Hematopoietic cell lineage                      | 5                        | 1.99534                  | 0.0491144          |

**Table S18. Significantly enriched gene ontology (GO) terms at Biological Process level for 416 positively selected genes in giant and red pandas, using the 14,254 genes as the reference. The GO terms associated with the limb development and utilization of essential nutrients are in red italics.**

| <b>GO ID</b> | <b>GO Term</b>                                                                 | <b>Observed number of genes</b> | <b>Expected number of genes</b> | <b><i>P-value</i></b> |
|--------------|--------------------------------------------------------------------------------|---------------------------------|---------------------------------|-----------------------|
| GO:0030574   | collagen catabolic process                                                     | 14                              | 1.99534                         | 8.15841E-09           |
| GO:0044243   | multicellular organismal catabolic process                                     | 14                              | 2.20074                         | 3.07856E-08           |
| GO:0032963   | collagen metabolic process                                                     | 15                              | 2.81695                         | 1.18739E-07           |
| GO:0044259   | multicellular organismal macromolecule metabolic process                       | 15                              | 2.93432                         | 2.06616E-07           |
| GO:0022617   | extracellular matrix disassembly                                               | 16                              | 3.34513                         | 2.08958E-07           |
| GO:0044236   | multicellular organismal metabolic process                                     | 15                              | 3.22776                         | 7.33937E-07           |
| GO:0050854   | regulation of antigen receptor mediated signaling pathway                      | 8                               | 1.11504                         | 1.15794E-05           |
| GO:0050856   | regulation of T cell receptor signaling pathway                                | 5                               | 0.792267                        | 0.00100482            |
| GO:0050858   | negative regulation of antigen receptor mediated signaling pathway             | 4                               | 0.498835                        | 0.00128314            |
| GO:0000042   | protein targeting to Golgi                                                     | 4                               | 0.528178                        | 0.00161188            |
| GO:0071230   | cellular response to amino acid stimulus                                       | 6                               | 1.2911                          | 0.00168916            |
| GO:1900746   | regulation of vascular endothelial growth factor signaling pathway             | 3                               | 0.264089                        | 0.00184631            |
| GO:0072600   | establishment of protein localization to Golgi                                 | 4                               | 0.586865                        | 0.00243648            |
| GO:0086069   | bundle of His cell to Purkinje myocyte communication                           | 3                               | 0.293432                        | 0.00258046            |
| GO:1902547   | regulation of cellular response to vascular endothelial growth factor stimulus | 3                               | 0.293432                        | 0.00258046            |
| GO:0010310   | regulation of hydrogen peroxide metabolic process                              | 3                               | 0.322776                        | 0.00347141            |
| GO:1903792   | negative regulation of anion transport                                         | 4                               | 0.645551                        | 0.00351224            |
| GO:0000301   | retrograde transport vesicle recycling within Golgi                            | 4                               | 0.645551                        | 0.00351224            |

|            |                                                                         |    |          |            |
|------------|-------------------------------------------------------------------------|----|----------|------------|
| GO:0061337 | cardiac conduction                                                      | 6  | 1.55519  | 0.00440483 |
| GO:0002710 | negative regulation of T cell mediated immunity                         | 3  | 0.352119 | 0.0045286  |
| GO:0050855 | regulation of B cell receptor signaling pathway                         | 3  | 0.352119 | 0.0045286  |
| GO:0014063 | negative regulation of serotonin secretion                              | 2  | 0.117373 | 0.00495524 |
| GO:0002027 | regulation of heart rate                                                | 7  | 2.11271  | 0.00508309 |
| GO:0010640 | regulation of platelet derived growth factor receptor signaling pathway | 3  | 0.381462 | 0.00576024 |
| GO:0086065 | cell communication involved in cardiac conduction                       | 5  | 1.17373  | 0.00599719 |
| GO:0050860 | negative regulation of T cell receptor signaling pathway                | 3  | 0.410805 | 0.00717339 |
| GO:0050851 | antigen receptor mediated signaling pathway                             | 12 | 5.34047  | 0.00748964 |
| GO:0009313 | oligosaccharide catabolic process                                       | 2  | 0.146716 | 0.00809873 |
| GO:2001204 | regulation of osteoclast development                                    | 2  | 0.146716 | 0.00809873 |
| GO:0006891 | intra Golgi vesicle mediated transport                                  | 5  | 1.26176  | 0.00816823 |
| GO:0050857 | positive regulation of antigen receptor mediated signaling pathway      | 3  | 0.440149 | 0.008774   |
| GO:0006837 | serotonin transport                                                     | 3  | 0.469492 | 0.010567   |
| GO:0061515 | myeloid cell development                                                | 5  | 1.34979  | 0.0108314  |
| GO:0009311 | oligosaccharide metabolic process                                       | 5  | 1.34979  | 0.0108314  |
| GO:0034638 | phosphatidylcholine catabolic process                                   | 2  | 0.176059 | 0.0119133  |
| GO:0014062 | regulation of serotonin secretion                                       | 2  | 0.176059 | 0.0119133  |
| GO:0030048 | actin filament based movement                                           | 8  | 3.16907  | 0.0141148  |
| GO:0070252 | actin mediated cell contraction                                         | 7  | 2.5822   | 0.0147383  |
| GO:0034067 | protein localization to Golgi apparatus                                 | 4  | 0.968327 | 0.015259   |
| GO:2001135 | regulation of endocytic recycling                                       | 2  | 0.205403 | 0.0163571  |
| GO:0007229 | integrin mediated signaling pathway                                     | 7  | 2.75826  | 0.0205003  |
| GO:0008016 | regulation of heart contraction                                         | 9  | 4.07871  | 0.0213458  |
| GO:0048739 | cardiac muscle fiber development                                        | 2  | 0.234746 | 0.0213901  |
| GO:0060973 | cell migration involved in heart development                            | 2  | 0.234746 | 0.0213901  |

|                   |                                                                                                                                                  |          |                 |                  |
|-------------------|--------------------------------------------------------------------------------------------------------------------------------------------------|----------|-----------------|------------------|
| GO:0046643        | regulation of gamma delta T cell activation                                                                                                      | 2        | 0.234746        | 0.0213901        |
| GO:0038084        | vascular endothelial growth factor signaling pathway                                                                                             | 3        | 0.616208        | 0.0225282        |
| GO:0042036        | negative regulation of cytokine biosynthetic process                                                                                             | 3        | 0.645551        | 0.0255308        |
| GO:0002707        | negative regulation of lymphocyte mediated immunity                                                                                              | 3        | 0.645551        | 0.0255308        |
| GO:0042269        | regulation of natural killer cell mediated cytotoxicity                                                                                          | 3        | 0.645551        | 0.0255308        |
| GO:0002715        | regulation of natural killer cell mediated immunity                                                                                              | 3        | 0.645551        | 0.0255308        |
| GO:0086005        | ventricular cardiac muscle cell action potential                                                                                                 | 3        | 0.645551        | 0.0255308        |
| GO:0050853        | B cell receptor signaling pathway                                                                                                                | 4        | 1.14439         | 0.0267559        |
| GO:0030049        | muscle filament sliding&actin myosin filament sliding                                                                                            | 4        | 1.14439         | 0.0267559        |
| GO:0007528        | neuromuscular junction development                                                                                                               | 4        | 1.14439         | 0.0267559        |
| GO:0097202        | activation of cysteine type endopeptidase activity                                                                                               | 6        | 2.28877         | 0.0268624        |
| GO:0090161        | Golgi ribbon formation                                                                                                                           | 2        | 0.264089        | 0.0269741        |
| GO:0001911        | negative regulation of leukocyte mediated cytotoxicity                                                                                           | 2        | 0.264089        | 0.0269741        |
| GO:0010642        | negative regulation of platelet derived growth factor receptor signaling pathway                                                                 | 2        | 0.264089        | 0.0269741        |
| GO:0045060        | negative thymic T cell selection                                                                                                                 | 2        | 0.264089        | 0.0269741        |
| GO:1900040        | regulation of interleukin 2 secretion                                                                                                            | 2        | 0.264089        | 0.0269741        |
| GO:0060048        | cardiac muscle contraction                                                                                                                       | 7        | 2.93432         | 0.0276716        |
| GO:0002823        | negative regulation of adaptive immune response based on somatic recombination of immune receptors built from immunoglobulin superfamily domains | 3        | 0.674894        | 0.0287372        |
| GO:0032731        | positive regulation of interleukin 1 beta production                                                                                             | 3        | 0.674894        | 0.0287372        |
| GO:0045577        | regulation of B cell differentiation                                                                                                             | 3        | 0.674894        | 0.0287372        |
| <i>GO:0051180</i> | <i>vitamin transport</i>                                                                                                                         | <i>3</i> | <i>0.674894</i> | <i>0.0287372</i> |
| <i>GO:0098751</i> | <i>bone cell development</i>                                                                                                                     | <i>3</i> | <i>0.704238</i> | <i>0.0321465</i> |
| GO:0086091        | regulation of heart rate by cardiac conduction                                                                                                   | 3        | 0.704238        | 0.0321465        |
| GO:0071872        | cellular response to epinephrine stimulus                                                                                                        | 2        | 0.293432        | 0.0330725        |
| GO:0046629        | gamma delta T cell activation                                                                                                                    | 2        | 0.293432        | 0.0330725        |
| GO:0043383        | negative T cell selection                                                                                                                        | 2        | 0.293432        | 0.0330725        |

|            |                                                                                                                  |   |          |           |
|------------|------------------------------------------------------------------------------------------------------------------|---|----------|-----------|
| GO:0031342 | negative regulation of cell killing                                                                              | 2 | 0.293432 | 0.0330725 |
| GO:0036035 | osteoclast development                                                                                           | 2 | 0.293432 | 0.0330725 |
| GO:0001956 | positive regulation of neurotransmitter secretion                                                                | 2 | 0.293432 | 0.0330725 |
| GO:0033235 | positive regulation of protein sumoylation                                                                       | 2 | 0.293432 | 0.0330725 |
| GO:2000810 | regulation of bicellular tight junction assembly                                                                 | 2 | 0.293432 | 0.0330725 |
| GO:0050852 | T cell receptor signaling pathway                                                                                | 9 | 4.43083  | 0.033996  |
| GO:0017144 | drug metabolic process                                                                                           | 4 | 1.23242  | 0.0340192 |
| GO:0031638 | zymogen activation                                                                                               | 7 | 3.08104  | 0.0348176 |
| GO:0071870 | cellular response to catecholamine stimulus                                                                      | 3 | 0.733581 | 0.0357573 |
| GO:0071868 | cellular response to monoamine stimulus                                                                          | 3 | 0.733581 | 0.0357573 |
| GO:0014047 | glutamate secretion                                                                                              | 4 | 1.26176  | 0.0366705 |
| GO:0007030 | Golgi organization                                                                                               | 6 | 2.46483  | 0.0368073 |
| GO:0002820 | negative regulation of adaptive immune response                                                                  | 3 | 0.762924 | 0.0395676 |
| GO:0035637 | multicellular organismal signaling                                                                               | 7 | 3.16907  | 0.0396439 |
| GO:0035584 | calcium mediated signaling using intracellular calcium source                                                    | 2 | 0.322776 | 0.0396505 |
| GO:0009109 | coenzyme catabolic process                                                                                       | 2 | 0.322776 | 0.0396505 |
| GO:0046475 | glycerophospholipid catabolic process                                                                            | 2 | 0.322776 | 0.0396505 |
| GO:0070970 | interleukin 2 secretion                                                                                          | 2 | 0.322776 | 0.0396505 |
| GO:0031953 | negative regulation of protein autophosphorylation                                                               | 2 | 0.322776 | 0.0396505 |
| GO:1900409 | positive regulation of cellular response to oxidative stress&positive regulation of response to oxidative stress | 2 | 0.322776 | 0.0396505 |
| GO:0036010 | protein localization to endosome                                                                                 | 2 | 0.322776 | 0.0396505 |
| GO:1903010 | regulation of bone development                                                                                   | 2 | 0.322776 | 0.0396505 |
| GO:0071871 | response to epinephrine                                                                                          | 2 | 0.322776 | 0.0396505 |
| GO:0001820 | serotonin secretion                                                                                              | 2 | 0.322776 | 0.0396505 |
| GO:0006941 | striated muscle contraction                                                                                      | 8 | 3.90265  | 0.0422066 |
| GO:0031333 | negative regulation of protein complex assembly                                                                  | 6 | 2.55286  | 0.0425588 |



|            |                                                                                                       |   |          |           |
|------------|-------------------------------------------------------------------------------------------------------|---|----------|-----------|
| GO:0032732 | positive regulation of interleukin 1 production                                                       | 3 | 0.792267 | 0.0435749 |
| GO:0071869 | response to catecholamine                                                                             | 3 | 0.792267 | 0.0435749 |
| GO:0071732 | cellular response to nitric oxide                                                                     | 2 | 0.352119 | 0.0466749 |
| GO:0007253 | cytoplasmic sequestering of NF kappaB                                                                 | 2 | 0.352119 | 0.0466749 |
| GO:0098909 | regulation of cardiac muscle cell action potential<br>involved in regulation of contraction           | 2 | 0.352119 | 0.0466749 |
| GO:0043271 | negative regulation of ion transport                                                                  | 6 | 2.61155  | 0.0466899 |
| GO:0071867 | response to monoamine                                                                                 | 3 | 0.821611 | 0.0477765 |
| GO:0050885 | neuromuscular process controlling balance                                                             | 4 | 1.37913  | 0.0484345 |
| GO:0051283 | negative regulation of sequestering of calcium<br>ion&release of sequestered calcium ion into cytosol | 5 | 1.99534  | 0.0491144 |

---

**Table S19. 70 positively selected genes with nonrandom convergent amino acid substitution between red and giant pandas.**

| <b>Gene symbol</b> | <b><i>P</i>-value</b> | <b><i>FDR</i></b> | <b>Position of convergent amino acid substitution</b> | <b>Ancestral amino acid</b> | <b>Descendant amino acid</b> |
|--------------------|-----------------------|-------------------|-------------------------------------------------------|-----------------------------|------------------------------|
| <i>A2M</i>         | 9.94E-06              | 1.74E-03          | 301                                                   | S                           | T                            |
| <i>ABCA6</i>       | 8.43E-05              | 9.80E-03          | 1430                                                  | N                           | D                            |
| <i>ACOT11</i>      | 1.75E-14              | 9.80E-12          | 528                                                   | L                           | I                            |
| <i>ADH1C</i>       | 1.75E-04              | 2.00E-02          | 187                                                   | V                           | I                            |
| <i>BAHCC1</i>      | 3.31E-05              | 4.24E-03          | 1356                                                  | S                           | G                            |
| <i>C11orf86</i>    | 3.64E-04              | 4.94E-02          | 95                                                    | R                           | S                            |
| <i>C17orf104</i>   | 1.10E-03              | 9.30E-02          | 378                                                   | N                           | Y                            |
| <i>C3orf17</i>     | 4.74E-04              | 6.24E-02          | 343                                                   | H                           | C                            |
| <i>C7orf49</i>     | 2.32E-04              | 3.55E-02          | 29                                                    | V                           | A                            |
|                    |                       |                   | 23                                                    | E                           | K                            |
|                    |                       |                   | 147                                                   | M                           | V                            |
| <i>CCDC30</i>      | 1.27E-04              | 2.79E-02          | 543                                                   | Q                           | R                            |
| <i>CCDC73</i>      | 7.02E-09              | 3.62E-06          | 723                                                   | K                           | L                            |
| <i>CD163L1</i>     | 1.42E-11              | 2.05E-08          |                                                       | A                           | T                            |
| <i>CDHR2</i>       | 9.54E-06              | 3.36E-03          | 1064                                                  | M                           | T                            |
|                    |                       |                   | 921                                                   | M                           | V                            |
| <i>CEACAM1</i>     | 5.27E-05              | 1.42E-02          | 89                                                    | T                           | A                            |
|                    |                       |                   | 358                                                   | R                           | G                            |
| <i>COL16A1</i>     | 9.50E-07              | 1.89E-04          | 58                                                    | N                           | S                            |
| <i>COL4A6</i>      | 9.23E-07              | 5.65E-04          | 1095                                                  | M                           | V                            |
|                    |                       |                   | 681                                                   | R                           | H                            |
| <i>CPB1</i>        | 3.13E-06              | 4.73E-04          | 218                                                   | V                           | F                            |
|                    |                       |                   | 310                                                   | M                           | L                            |
|                    |                       |                   | 271                                                   | T                           | I                            |
| <i>CYP3A5</i>      | 2.58E-09              | 3.03E-06          | 363                                                   | T                           | S                            |
|                    |                       |                   | 393                                                   | V                           | L                            |
|                    |                       |                   | 400                                                   | T                           | S                            |
|                    |                       |                   | 395                                                   | M                           | I                            |
| <i>CYP4F2</i>      | 9.99E-06              | 2.19E-03          | 92                                                    | M                           | F                            |
| <i>DDX54</i>       | 5.16E-05              | 2.16E-02          | 660                                                   | P                           | L                            |
| <i>DENND5B</i>     | 7.14E-04              | 7.78E-02          | 892                                                   | S                           | G                            |
| <i>DYNC2H1</i>     | 1.06E-04              | 3.72E-02          | 3128                                                  | R                           | K                            |
|                    |                       |                   | 3999                                                  | K                           | R                            |
| <i>F7</i>          | 4.11E-05              | 1.20E-02          | 346                                                   | Q                           | R                            |
| <i>FAM170A</i>     | 7.48E-04              | 7.01E-02          | 16                                                    | P                           | L                            |
| <i>FCRL3</i>       | 8.09E-04              | 7.35E-02          | 384                                                   | I                           | V                            |
| <i>GIF</i>         | 2.42E-04              | 3.63E-02          | 406                                                   | D                           | K                            |

|               |          |          |       |      |   |
|---------------|----------|----------|-------|------|---|
|               |          |          | 212   | M    | L |
|               |          |          | 407   | H    | D |
| <i>GPR56</i>  | 2.70E-04 | 6.87E-02 | 248   | D    | N |
|               |          |          | 252   | H    | R |
| <i>HERC6</i>  | 8.46E-05 | 9.80E-03 | 836   | V    | A |
| <i>HEXB</i>   | 9.19E-04 | 7.97E-02 | 522   | L    | I |
| <i>IFI16</i>  | 5.18E-05 | 6.33E-03 | 60    | A    | L |
|               |          |          | 57    | P    | R |
| <i>IRX5</i>   | 6.48E-04 | 7.12E-02 | 126   | A    | S |
| <i>ITGAM</i>  | 1.44E-06 | 7.77E-04 | 549   | N    | S |
| <i>KIF27</i>  | 2.79E-04 | 4.04E-02 | 664   | H    | R |
|               |          |          | 662   | R    | G |
| <i>KRT75</i>  | 1.11E-16 | 2.40E-13 | 213   | S    | G |
|               |          |          | 202   | T    | A |
|               |          |          | 287   | L    | F |
| <i>LAG3</i>   | 9.02E-05 | 2.20E-02 | 456   | L    | P |
| <i>LETM1</i>  | 6.47E-07 | 1.33E-04 | 683   | I    | V |
| <i>LRRC36</i> | 1.45E-07 | 3.13E-05 | 477   | R    | Q |
| <i>MDC1</i>   | 5.83E-04 | 7.45E-02 | 18    | E    | K |
| <i>MUC16</i>  | 2.00E-15 | 1.58E-12 | 12412 | K    | R |
|               |          |          | 13413 | W    | Q |
|               |          |          | 12075 | P    | L |
|               |          |          | 13437 | V    | I |
|               |          |          | 12631 | Q    | R |
|               |          |          | 12088 | E    | T |
|               |          |          | 13432 | R    | P |
|               |          |          | 13424 | Q    | R |
|               |          |          | 13341 | Q    | S |
|               |          |          | 12072 | F    | S |
|               |          |          | 13491 | R    | H |
|               |          |          | 13261 | Q    | R |
|               |          |          | 12092 | R    | G |
|               |          |          | 13417 | Q, H | R |
|               |          |          | 13339 | D    | G |
| <i>MYH1</i>   | 2.56E-05 | 1.28E-02 | 9     | I    | V |
| <i>MYH3</i>   | 3.60E-05 | 5.18E-03 | 812   | I    | V |
| <i>MYH6</i>   | 3.70E-04 | 4.97E-02 | 1025  | S    | A |
|               |          |          | 417   | S    | N |
|               |          |          | 1733  | E    | D |
|               |          |          | 1734  | S    | A |
| <i>MYT1L</i>  | 3.57E-09 | 1.00E-06 | 297   | M    | V |
| <i>NFAMI</i>  | 8.21E-04 | 9.63E-02 | 44    | S    | L |
| <i>NLRP12</i> | 1.24E-09 | 3.09E-07 | 607   | Q    | R |

|                |          |          |      |   |   |
|----------------|----------|----------|------|---|---|
|                |          |          | 171  | W | R |
|                |          |          | 285  | V | A |
| <i>NXPE4</i>   | 5.32E-05 | 1.42E-02 |      | N | K |
| <i>OR4D10</i>  | 1.49E-04 | 1.63E-02 |      | R | K |
| <i>PARP9</i>   | 1.45E-06 | 7.77E-04 | 373  | E | D |
| <i>PCNT</i>    | 3.18E-05 | 9.68E-03 | 2327 | S | P |
|                |          |          | 2458 | Q | R |
| <i>PRSSI</i>   | 3.47E-04 | 3.62E-02 | 119  | D | N |
|                |          |          | 140  | I | V |
| <i>PRSS36</i>  | 7.73E-12 | 3.45E-09 | 57   | R | S |
| <i>PTPRC</i>   | 2.81E-09 | 6.74E-07 | 58   | S | L |
| <i>RIBC1</i>   | 3.70E-04 | 3.83E-02 | 141  | C | Y |
|                |          |          | 128  | G | S |
| <i>RTN3</i>    | 1.58E-04 | 3.16E-02 |      | T | A |
| <i>SCRN2</i>   | 4.14E-04 | 7.59E-02 | 388  | R | Q |
| <i>SLC4A1</i>  | 1.52E-04 | 3.13E-02 | 95   | G | S |
| <i>SLC6A13</i> | 4.81E-04 | 4.79E-02 | 335  | V | I |
|                |          |          | 429  | F | L |
| <i>SORL1</i>   | 9.45E-10 | 2.98E-07 | 1207 | H | R |
| <i>SP140</i>   | 2.26E-04 | 4.32E-02 | 746  | R | G |
|                |          |          | 600  | M | I |
|                |          |          | 589  | I | E |
|                |          |          | 597  | V | A |
|                |          |          | 586  | H | L |
|                |          |          | 575  | R | E |
|                |          |          | 604  | K | E |
|                |          |          | 588  | Q | P |
|                |          |          | 577  | R | P |
| <i>SPTBN5</i>  | 8.73E-12 | 3.45E-09 | 3244 | P | L |
|                |          |          | 3315 | Q | R |
|                |          |          | 855  | S | L |
|                |          |          | 75   | I | V |
|                |          |          | 1002 | V | M |
|                |          |          | 1724 | Q | R |
| <i>TAF7L</i>   | 2.76E-06 | 4.22E-04 | 419  | I | L |
|                |          |          | 411  | K | R |
| <i>TESPA1</i>  | 1.80E-04 | 2.87E-02 | 480  | Q | W |
| <i>TMEM89</i>  | 8.33E-07 | 1.40E-04 | 107  | S | C |
| <i>TRIB3</i>   | 6.23E-04 | 6.90E-02 | 2    | R | Q |
| <i>TRIM22</i>  | 3.71E-09 | 8.75E-07 | 12   | E | D |
|                |          |          | 98   | E | K |
| <i>UGT3A2</i>  | 4.83E-04 | 8.62E-02 | 426  | Q | E |
| <i>XDH</i>     | 1.15E-05 | 1.98E-03 |      | Q | R |

|               |          |          |     |   |   |
|---------------|----------|----------|-----|---|---|
| <i>XKR6</i>   | 4.82E-05 | 8.14E-03 | 360 | H | Q |
| <i>ZNF284</i> | 1.03E-03 | 8.87E-02 | 53  | K | R |
| <i>ZNF746</i> | 3.35E-04 | 4.65E-02 | 95  | I | V |
|               |          |          | 103 | K | S |

---

**Table S20. Gene function, metabolic pathway involved and mutant phenotypes in humans and mice of 70 adaptively convergent genes. Disease/disorder/phenotype in humans are from OMIM ([www.omim.org](http://www.omim.org)) and GeneCards databases ([www.genecards.org](http://www.genecards.org)), and mutant phenotypes in mice are from MGI database ([informatics.jax.org](http://informatics.jax.org)).**

| Gene symbol   | Full gene name                                        | Gene function                                                                                                                                   | Pathways involved                                                                                                                           | Disease/disorder/phenotype in humans                   | Mutant phenotype in mice                                                                                                                                                                                                    |
|---------------|-------------------------------------------------------|-------------------------------------------------------------------------------------------------------------------------------------------------|---------------------------------------------------------------------------------------------------------------------------------------------|--------------------------------------------------------|-----------------------------------------------------------------------------------------------------------------------------------------------------------------------------------------------------------------------------|
| <i>A2M</i>    | alpha-2-macroglobulin                                 | Protease inhibitor                                                                                                                              | Signaling by GPCR; Rho GTPase cycle                                                                                                         | Alpha-2-macroglobulin deficiency; Alzheimer disease    | ---                                                                                                                                                                                                                         |
| <i>ABCA6</i>  | ATP-binding cassette, sub-family A, member 6          | Energy-dependent transport of a wide variety of substrates across membranes, and may play a role in macrophage lipid homeostasis                | Transport of glucose and other sugars, bile salts and organic acids, metal ions and amine compounds; ABC-family proteins mediated transport | ---                                                    | ---                                                                                                                                                                                                                         |
| <i>ACOT11</i> | acyl-CoA thioesterase 11                              | Catalyse the conversion of activated fatty acids to the corresponding non-esterified fatty acid and coenzyme A                                  | ---                                                                                                                                         | Obesity                                                | Mice homozygous for a null mutation display resistance to high fat diet induced obesity, inflammation and hepatic steatosis, increased energy expenditure, increased brown adipose tissue amount, and increased food intake |
| <i>ADH1C</i>  | alcohol dehydrogenase 1C (class I), gamma polypeptide | Metabolize a wide variety of substrates, including ethanol, retinol, other aliphatic alcohols, hydroxysteroids, and lipid peroxidation products | Metabolism                                                                                                                                  | Alcohol dependence; Liver cirrhosis; Parkinson disease | Homozygotes for targeted null mutations exhibit impaired metabolism of (and sensitivity to) ethanol and retinol                                                                                                             |

|                  |                                                           |                                                                                                        |                                   |                                                      |                                                                                                                                                    |
|------------------|-----------------------------------------------------------|--------------------------------------------------------------------------------------------------------|-----------------------------------|------------------------------------------------------|----------------------------------------------------------------------------------------------------------------------------------------------------|
| <i>BAHCC1</i>    | BAH domain and coiled-coil containing 1                   | ---                                                                                                    | ---                               | ---                                                  | Homozygous mutation of this gene results in perinatal lethality for the majority of mutants; those that survive exhibit hind leg motor dysfunction |
| <i>C11orf86</i>  | chromosome 11 open reading frame 86                       | ---                                                                                                    | ---                               | ---                                                  | ---                                                                                                                                                |
| <i>C17orf104</i> | chromosome 17 open reading frame 104                      | ---                                                                                                    | ---                               | ---                                                  | ---                                                                                                                                                |
| <i>C3orf17</i>   | chromosome 3 open reading frame 17                        | ---                                                                                                    | Notch signaling pathway           | ---                                                  | Mice homozygous for a knock-out allele exhibit lethality prior to implantation with a failure to form a blastocyst                                 |
| <i>C7orf49</i>   | chromosome 7 open reading frame 49                        | Regulator of proteasome                                                                                | ---                               | Post-traumatic stress disorder and colorectal cancer | ---                                                                                                                                                |
| <i>CCDC30</i>    | coiled-coil domain containing 30                          | ---                                                                                                    | ---                               | ---                                                  | ---                                                                                                                                                |
| <i>CCDC73</i>    | coiled-coil domain containing 73                          | ---                                                                                                    | ---                               | ---                                                  | ---                                                                                                                                                |
| <i>CD163L1</i>   | CD163 molecule-like 1                                     | ---                                                                                                    | ---                               | ---                                                  | ---                                                                                                                                                |
| <i>CDHR2</i>     | cadherin-related family member 2                          | Contact inhibition at the lateral surface of epithelial cells                                          | ---                               | ---                                                  | ---                                                                                                                                                |
| <i>CEACAM1</i>   | carcinoembryonic antigen-related cell adhesion molecule 1 | Mediate cell adhesion via homophilic as well as heterophilic binding to other proteins of the subgroup | Adhesion; EGFR1 signaling pathway | Gonorrhea; Adenomatoid tumor                         | Mice lacking appreciable levels of the two isoforms containing 4 Ig domains and having increased levels of the two isoforms containing             |

|                |                                                       |                                                                                                                                    |                                                                                                                                                           |                                                                               |                                                                                                                                                                                |
|----------------|-------------------------------------------------------|------------------------------------------------------------------------------------------------------------------------------------|-----------------------------------------------------------------------------------------------------------------------------------------------------------|-------------------------------------------------------------------------------|--------------------------------------------------------------------------------------------------------------------------------------------------------------------------------|
| <i>COL16A1</i> | collagen, type XVI, alpha 1                           | Mediate cell attachment and induce integrin-mediated cellular reactions, such as cell spreading and alterations in cell morphology | ERK signaling                                                                                                                                             | ---                                                                           | 2 Ig domains are viable and fertile. They are significantly more resistant to mouse hepatitis virus than wild-type mice.<br>---                                                |
| <i>COL4A6</i>  | collagen, type IV, alpha 6                            | Major structural component of glomerular basement membranes                                                                        | PI3K-Akt signaling pathway; Pathways in cancer                                                                                                            | Deafness, X-linked 6; X-linked non-syndromic sensorineural deafness type dfn  | Male mice hemizygous for a knock-out allele are viable, fertile and healthy with no apparent defects in the topology of neuromuscular junctions in the diaphragm muscle<br>--- |
| <i>CPB1</i>    | carboxypeptidase B1                                   | Preferential release of a C-terminal lysine or arginine amino acid                                                                 | Biosynthesis of the N-glycan precursor (dolichol lipid-linked oligosaccharide, LLO) and transfer to a nascent protein; Pancreatic secretion<br>Metabolism | Trachea leiomyoma; Tricuspid valve insufficiency                              | ---                                                                                                                                                                            |
| <i>CYP3A5</i>  | cytochrome P450, family 3, subfamily A, polypeptide 5 | Oxidize a variety of structurally unrelated compounds, including steroids, fatty acids, and xenobiotics                            | Metabolism                                                                                                                                                | Tacrolimus dose selection and engraftment syndrome; Salt-sensitive essential, | ---                                                                                                                                                                            |



|                |                                                       |                                                                                                         |                                                                                   |                                                                                                                           |                                                                                                                                                                                                                                                                                                                  |
|----------------|-------------------------------------------------------|---------------------------------------------------------------------------------------------------------|-----------------------------------------------------------------------------------|---------------------------------------------------------------------------------------------------------------------------|------------------------------------------------------------------------------------------------------------------------------------------------------------------------------------------------------------------------------------------------------------------------------------------------------------------|
| <i>CYP4F2</i>  | cytochrome P450, family 4, subfamily F, polypeptide 2 | Oxidize a variety of structurally unrelated compounds, including steroids, fatty acids, and xenobiotics | Metabolism                                                                        | susceptibility to hypertension<br>Vitamin K antagonists toxicity or dose selection                                        | ---                                                                                                                                                                                                                                                                                                              |
| <i>DDX54</i>   | DEAD (Asp-Glu-Ala-Asp) box polypeptide 54             | Has RNA-dependent ATPase activity; Represses the transcriptional activity of nuclear receptors          | ---                                                                               | ---                                                                                                                       | ---                                                                                                                                                                                                                                                                                                              |
| <i>DENND5B</i> | DENN/MADD domain containing 5B                        | Convert inactive GDP-bound Rab proteins into their active GTP-bound form                                | ---                                                                               | ---                                                                                                                       | Mice homozygous for an ENU-induced allele exhibit normal blood lymphocyte populations                                                                                                                                                                                                                            |
| <i>DYNC2H1</i> | dynein, cytoplasmic 2, heavy chain 1                  | Function as a motor for intraflagellar retrograde transport                                             | Class I MHC mediated antigen processing and presentation;<br>Salmonella infection | Short-rib thoracic dysplasia 3 with or without polydactyly;<br>Short-rib thoracic dysplasia 6 with or without polydactyly | Homozygotes for a gene trap allele show complete embryonic lethality with altered heart looping and brain morphology;<br>Chemically induced mutants show randomized heart looping and polydactyly;<br>Holoprosencephaly or exencephaly, micrognathia, and cardiac, renal, airway and eye defects may be observed |
| <i>F7</i>      | coagulation factor VII                                | Initiate the extrinsic                                                                                  | Hemostasis and                                                                    | Factor VII deficiency                                                                                                     | Mice homozygous for a                                                                                                                                                                                                                                                                                            |

|                |                                                            | pathway of blood coagulation                                                                       | formation of fibrin clot (Clotting Cascade) | and proconvertin deficiency, congenital; Decreased susceptibility to myocardial infarction | targeted null mutation developed normally through embryogenesis, and exhibited no vascular defects; however, 70% of homozygous neonates suffered fatal intra-abdominal haemorrhaging and died within 24 hours after birth |
|----------------|------------------------------------------------------------|----------------------------------------------------------------------------------------------------|---------------------------------------------|--------------------------------------------------------------------------------------------|---------------------------------------------------------------------------------------------------------------------------------------------------------------------------------------------------------------------------|
| <i>FAM170A</i> | family with sequence similarity 170, member A              | Act as a nuclear transcription factor that positively regulates the expression of heat shock genes | ---                                         | ---                                                                                        | ---                                                                                                                                                                                                                       |
| <i>FCRL3</i>   | Fc receptor-like 3                                         | May play a role in regulation of the immune system                                                 | ---                                         | Autoimmune pancreatitis; Juvenile rheumatoid arthritis                                     | ---                                                                                                                                                                                                                       |
| <i>GIF</i>     | gastric intrinsic factor                                   | Promote absorption of the essential vitamin cobalamin (Cbl) in the ileum                           | Disease; Metabolism                         | Intrinsic factor deficiency                                                                | ---                                                                                                                                                                                                                       |
| <i>GPR56</i>   | G protein-coupled receptor 56                              | Regulate the migration of neural precursor cells                                                   | Other GPCRs                                 | Bilateral frontoparietal polymicrogyria; Bilateral perisylvian polymicrogyria              | Mice homozygous for a null allele exhibit neuronal ectopias in the frontoparietal cortex due to disruptions in the pial basement membrane                                                                                 |
| <i>HERC6</i>   | HECT and RLD domain containing E3 ubiquitin protein ligase | Catalyze the formation of a thioester with ubiquitin before transferring it to a                   | ---                                         | ---                                                                                        | ---                                                                                                                                                                                                                       |

|              |                                        |                                                                                                                                                                       |                                                                   |                                                                    |                                                                                                                                                                                                                                   |
|--------------|----------------------------------------|-----------------------------------------------------------------------------------------------------------------------------------------------------------------------|-------------------------------------------------------------------|--------------------------------------------------------------------|-----------------------------------------------------------------------------------------------------------------------------------------------------------------------------------------------------------------------------------|
| <i>HEXB</i>  | family member 6<br>hexosaminidase B    | substrate<br>Responsible for the degradation of GM2 gangliosides, and a variety of other molecules containing terminal N-acetyl hexosamines                           | Disease; Sphingolipid metabolism                                  | Sandhoff disease, infantile, juvenile, and adult forms             | Homozygous mutants exhibit spasticity, muscle weakness, rigidity, tremors, and ataxia beginning around 4 months of age and resulting in death about 6 weeks later; Mutants accumulate GM2 ganglioside and glycolipid GA2 in brain |
| <i>IFI16</i> | interferon, gamma-inducible protein 16 | May function as a transcriptional repressor                                                                                                                           | Cytosolic sensors of pathogen-associated DNA; NF-kappaB signaling | ---                                                                | ---                                                                                                                                                                                                                               |
| <i>IRX5</i>  | iroquois homeobox 5                    | Establishes the cardiac repolarization gradient by its repressive actions on the KCND2 potassium-channel gene; Required for retinal cone bipolar cell differentiation | ---                                                               | Hamamy syndrome; Craniofacial dysplasia-osteopenia syndrome        | Mice homozygous for a knock-out allele exhibit reduced body size, narrow eye opening, and impaired retinal cone bipolar cell development                                                                                          |
| <i>ITGAM</i> | integrin, alpha M                      | Implicated in various adhesive interactions of monocytes, macrophages and granulocytes as well as in mediating the uptake of complement-coated particles              | Ras signaling pathway; Regulation of actin cytoskeleton           | Systemic lupus erythematosus, association with 6; Granulocytopenia | Homozygous null mice exhibit reduced staphylococcal enterotoxin-induced T cell proliferation, reduced neutrophil adhesion to fibrinogen, and defective homotypic aggregation and reduced degranulation of neutrophils             |

|               |                                                           |                                                                                                                                   |            |                                                                                                  |                                                                                                                                                                                                                                                 |
|---------------|-----------------------------------------------------------|-----------------------------------------------------------------------------------------------------------------------------------|------------|--------------------------------------------------------------------------------------------------|-------------------------------------------------------------------------------------------------------------------------------------------------------------------------------------------------------------------------------------------------|
| <i>KIF27</i>  | kinesin family member 27                                  | Play an essential role in motile ciliogenesis                                                                                     | ---        | ---                                                                                              | Homozygous mice are small and die by 8 weeks and exhibit hydrocephalus, rhinitis and otitis media                                                                                                                                               |
| <i>KRT75</i>  | keratin 75, type II                                       | Play a central role in hair and nail formation                                                                                    | ---        | Pseudofolliculitis barbae and loose anagen hair syndrome; Ectodermal dysplasia 4, hair/nail type | Mice homozygous for a knock-in mutation that results in the deletion of the highly conserved asparagine residue (N159) in the helix initiation peptide of this gene develop hair shaft and nail abnormalities resembling pachyonychia congenita |
| <i>LAG3</i>   | lymphocyte-activation gene 3                              | Involved in lymphocyte activation; Bind to HLA class-II antigens                                                                  | ---        | ---                                                                                              | Mice homozygous for disruptions in this gene have a generally normal phenotype but do display reduced natural killer cell activity and increased T cell response to infection                                                                   |
| <i>LETM1</i>  | leucine zipper-EF-hand containing transmembrane protein 1 | Crucial for the maintenance of mitochondrial tubular networks and for the assembly of the supercomplexes of the respiratory chain | ---        | Wolf-Hirschhorn syndrome                                                                         | ---                                                                                                                                                                                                                                             |
| <i>LRRC36</i> | leucine rich repeat containing 36                         | ---                                                                                                                               | ---        | ---                                                                                              | ---                                                                                                                                                                                                                                             |
| <i>MDC1</i>   | mediator Of                                               | Required for checkpoint                                                                                                           | Homologous | ---                                                                                              | Homozygous mutant mice                                                                                                                                                                                                                          |

|              |                                                   |                                                                                                                  |                                                                                                                       |                                                                                                    |                                                                                                                                                                    |
|--------------|---------------------------------------------------|------------------------------------------------------------------------------------------------------------------|-----------------------------------------------------------------------------------------------------------------------|----------------------------------------------------------------------------------------------------|--------------------------------------------------------------------------------------------------------------------------------------------------------------------|
|              | DNA-damage checkpoint 1                           | mediated cell cycle arrest in response to DNA damage within both the S phase and G2/M phases of the cell cycle   | recombination repair                                                                                                  |                                                                                                    | are smaller and display increased susceptibility to ionizing radiation, male infertility, T and B cell abnormalities, and increased genomic instability            |
| <i>MUC16</i> | mucin 16, cell surface associated                 | Thought to provide a protective, lubricating barrier against particles and infectious agents at mucosal surfaces | Biosynthesis of the N-glycan precursor (dolichol lipid-linked oligosaccharide, LLO) and transfer to a nascent protein | Mucinous ovarian cystadenoma; Pleural cancer                                                       | Homozygous null mice are viable and fertile with no gross histological abnormalities; Homozygous male mice father larger litters when crossed to wild-type females |
| <i>MYH1</i>  | myosin, heavy chain 1, skeletal muscle, adult     | Muscle contraction                                                                                               | RhoGDI pathway; ERK signaling                                                                                         | Familial gastric cancer                                                                            | Homozygotes for a targeted null mutation exhibit reduced growth, muscular weakness, kyphosis, and abnormal kinetics of muscle contraction and relaxation           |
| <i>MYH3</i>  | myosin, heavy chain 3, skeletal muscle, embryonic | Muscle contraction                                                                                               | RhoGDI pathway; ERK signaling                                                                                         | Arthrogryposis, distal, type 2b; Arthrogryposis, distal, type 2a; Arthrogryposis, distal, type 8   | ---                                                                                                                                                                |
| <i>MYH6</i>  | myosin, heavy chain 6, cardiac muscle, alpha      | Muscle contraction                                                                                               | RhoGDI pathway; ERK signaling                                                                                         | Cardiomyopathy, familial hypertrophic, 14 and atrial septal defect 3; Cardiomyopathy, dilated, 1EE | Mice homozygous for a knock-out allele exhibit embryonic lethality associated with heart defects while heterozygotes show cardiac myofibrillar                     |

|               |                                           |                                                                                                                                                                                                        |                                                                                                                                   |                                                                                                 |                                                                                                                                                                                                                                                                                            |
|---------------|-------------------------------------------|--------------------------------------------------------------------------------------------------------------------------------------------------------------------------------------------------------|-----------------------------------------------------------------------------------------------------------------------------------|-------------------------------------------------------------------------------------------------|--------------------------------------------------------------------------------------------------------------------------------------------------------------------------------------------------------------------------------------------------------------------------------------------|
|               |                                           |                                                                                                                                                                                                        |                                                                                                                                   |                                                                                                 | disarray, cardiac dysfunction and fibrosis. Mice heterozygous for different knock-in alleles may develop hypertrophic or dilated forms of cardiomyopathy                                                                                                                                   |
| <i>MYT1L</i>  | myelin transcription factor 1-like        | May function as a panneural transcription factor associated with neuronal differentiation                                                                                                              | ---                                                                                                                               | Mental retardation, autosomal dominant 39                                                       | ---                                                                                                                                                                                                                                                                                        |
| <i>NFAM1</i>  | NFAT activating protein with ITAM motif 1 | May function in immune system as a receptor which activates via the calcineurin/NFAT-signaling pathway the downstream cytokine gene promoters; May be involved in the regulation of B-cell development | ---                                                                                                                               | ---                                                                                             | ---                                                                                                                                                                                                                                                                                        |
| <i>NLRP12</i> | NLR family, pyrin domain containing 12    | May mediate activation of CASP1 via ASC and promote activation of NF-kappa-B via IKK                                                                                                                   | NOD-like receptor signaling pathways; Nucleotide-binding domain, leucine rich repeat containing receptor (NLR) signaling pathways | Familial cold autoinflammatory syndrome 2; Nlrp12-associated hereditary periodic fever syndrome | Mice homozygous for a null allele have defects in dendritic and myeloid cell migration and a decreased susceptibility to type IV hypersensitivity reactions; Mice homozygous for a second null allele display increased susceptibility to induced colitis and to chemically-induced tumors |

|               |                                                       |                                                                                                                                                                  |                                                                                 |                                                                               |                                                                                                                                                         |
|---------------|-------------------------------------------------------|------------------------------------------------------------------------------------------------------------------------------------------------------------------|---------------------------------------------------------------------------------|-------------------------------------------------------------------------------|---------------------------------------------------------------------------------------------------------------------------------------------------------|
| <i>NXPE4</i>  | neurexophilin and PC-esterase domain family, member 4 | ---                                                                                                                                                              | ---                                                                             | ---                                                                           | ---                                                                                                                                                     |
| <i>OR4D10</i> | olfactory receptor, family 4, subfamily D, member 10  | Odorant receptor                                                                                                                                                 | Signaling by GPCR                                                               | ---                                                                           | ---                                                                                                                                                     |
| <i>PARP9</i>  | poly (ADP-Ribose) polymerase family, member 9         | Play a role in PARP1-dependent DNA damage repair                                                                                                                 | Apoptotic pathways in synovial fibroblasts and UVA-induced MAPK signaling       | ---                                                                           | ---                                                                                                                                                     |
| <i>PCNT</i>   | pericentrin                                           | Integral component of the filamentous matrix of the centrosome involved in the initial establishment of organized microtubule arrays in both mitosis and meiosis | Mitotic cell cycle                                                              | Microcephalic osteodysplastic primordial dwarfism, type II; Seckel syndrome 4 | Mice homozygous for ENU mutations exhibit perinatal lethality, polydactyly, and abnormal interneuron migration; Heterozygotes exhibit sporadic seizures |
| <i>PRSSI</i>  | protease, serine, 1 (trypsin 1)                       | Act on peptide linkages involving the carboxyl group of lysine or arginine                                                                                       | Disease; Degradation of the extracellular matrix                                | Trypsinogen deficiency; <i>PRSSI</i> -related hereditary pancreatitis         | ---                                                                                                                                                     |
| <i>PRSS36</i> | protease, serine, 36                                  | Has a preference for substrates with an Arg or a Lys residue                                                                                                     | ---                                                                             | ---                                                                           | ---                                                                                                                                                     |
| <i>PTPRC</i>  | protein tyrosine phosphatase, receptor type, C        | Required for T-cell activation through the antigen receptor                                                                                                      | Class I MHC mediated antigen processing and presentation and L1CAM interactions | T-b+ severe combined immunodeficiency due to CD45 deficiency                  | ---                                                                                                                                                     |
| <i>RIBC1</i>  | RIB43A domain with coiled-coils 1                     | ---                                                                                                                                                              | ---                                                                             | ---                                                                           | ---                                                                                                                                                     |

|                |                                                                         |                                                                                                                                  |                                                                                                                                            |                                                                                                             |                                                                                                                                                                                                                                                                                          |
|----------------|-------------------------------------------------------------------------|----------------------------------------------------------------------------------------------------------------------------------|--------------------------------------------------------------------------------------------------------------------------------------------|-------------------------------------------------------------------------------------------------------------|------------------------------------------------------------------------------------------------------------------------------------------------------------------------------------------------------------------------------------------------------------------------------------------|
| <i>RTN3</i>    | reticulon 3                                                             | Inhibits BACE1 activity and amyloid precursor protein processing                                                                 | ---                                                                                                                                        | ---                                                                                                         | ---                                                                                                                                                                                                                                                                                      |
| <i>SCRN2</i>   | secernin 2                                                              | Dipeptidase                                                                                                                      | ---                                                                                                                                        | ---                                                                                                         | ---                                                                                                                                                                                                                                                                                      |
| <i>SLC4A1</i>  | solute carrier family 4 (anion exchanger), member 1 (Diego blood group) | Functions both as a transporter that mediates electroneutral anion exchange across the cell membrane and as a structural protein | Metabolism; Transport of glucose and other sugars, bile salts and organic acids, metal ions and amine compounds                            | Spherocytosis, type 4; Renal tubular acidosis, distal, AD; Renal tubular acidosis, distal, AR; Ovalocytosis | Homozygotes for null mutations exhibit retarded growth, severe spherocytosis, hemolytic anemia, lack of erythrocyte glycophorin A, mitotic defects, and high postnatal mortality                                                                                                         |
| <i>SLC6A13</i> | solute carrier family 6 (neurotransmitter transporter), member 13       | Sodium-dependent GABA and taurine transporter                                                                                    | Transport of glucose and other sugars, bile salts and organic acids, metal ions and amine compounds; Transmission across chemical synapses | Schizophrenia                                                                                               | Mice homozygous for a knock-out allele exhibit reduced taurine levels in the liver and increased taurine levels in the brain                                                                                                                                                             |
| <i>SORL1</i>   | sortilin-related receptor, L(DLR Class) A repeats containing            | May be implicated in the uptake of lipoproteins and of proteases                                                                 | ---                                                                                                                                        | Alzheimer disease; Early-onset autosomal dominant alzheimer disease                                         | Homozygous mutation of this gene results in decreased femoral artery intimal thickness after cuff placement and abolished angiotensin II stimulated vascular smooth muscle migration and attachment. Two other alleles show an increase in beta-amyloid deposits or peptide in the brain |



|               |                                                                        |                                                                                                                         |                    |                                                          |                                                                                                                                                                                                                                 |
|---------------|------------------------------------------------------------------------|-------------------------------------------------------------------------------------------------------------------------|--------------------|----------------------------------------------------------|---------------------------------------------------------------------------------------------------------------------------------------------------------------------------------------------------------------------------------|
| <i>SP140</i>  | SP140 nuclear body protein                                             | May be involved in the pathogenesis of acute promyelocytic leukemia and viral infection                                 | ---                | ---                                                      | ---                                                                                                                                                                                                                             |
| <i>SPTBN5</i> | spectrin, beta, non-erythrocytic 5                                     | ---                                                                                                                     | L1CAM interactions | Macular holes                                            | ---                                                                                                                                                                                                                             |
| <i>TAF7L</i>  | TAF7-like RNA polymerase II, TATA box binding protein (TBP)-associated | Probably function as a spermatogenesis-specific component of the DNA-binding general transcription factor complex TFIID | ---                | GPCR pathway; Apoptotic pathways in Synovial fibroblasts | Mice homozygous for a null allele display reduced male fertility, oligozoospermia, teratozoospermia, athenozoospermia, abnormal seminiferous tubules, and reduced testes weight on congenic but not on mixed strain backgrounds |
| <i>TESPA1</i> | thymocyte expressed, positive selection associated 1                   | Required for the development and maturation of T-cells                                                                  | ---                | ---                                                      | Mice homozygous for a knock-out allele exhibit impaired late thymocyte development                                                                                                                                              |
| <i>TMEM89</i> | transmembrane protein 89                                               | ---                                                                                                                     | ---                | ---                                                      | ---                                                                                                                                                                                                                             |
| <i>TRIB3</i>  | tribbles pseudokinase 3                                                | Disrupt insulin signaling by binding directly to Akt kinases and blocking their activation                              | PI-3K cascade      | Anoxia                                                   | Homozygous null mutants may display hypoactivity, decreased blood pressure and abnormal digit morphology or abnormal mast cell physiology                                                                                       |
| <i>TRIM22</i> | tripartite motif containing 22                                         | Interferon-induced antiviral protein involved in cell innate immunity                                                   | ---                | MHC class II deficiency; HIV-1                           | ---                                                                                                                                                                                                                             |

|               |                                                               |                                                                                                                                |                 |  |                                              |                                                                                                                                                                                                                                                                                                             |
|---------------|---------------------------------------------------------------|--------------------------------------------------------------------------------------------------------------------------------|-----------------|--|----------------------------------------------|-------------------------------------------------------------------------------------------------------------------------------------------------------------------------------------------------------------------------------------------------------------------------------------------------------------|
| <i>UGT3A2</i> | UDP glycosyltransferase 3 family, polypeptide A2              | Play an important role in the conjugation and subsequent elimination of potentially toxic xenobiotics and endogenous compounds | ---             |  | Gilbert syndrome                             | ---                                                                                                                                                                                                                                                                                                         |
| <i>XDH</i>    | xanthine dehydrogenase                                        | Oxidative metabolism of purines                                                                                                | Metabolism      |  | Xanthinuria, type I; Hereditary xanthinuria. | Homozygotes for a null allele are small and die prematurely while heterozygous females show a lactation defect; most homozygotes for another null allele die within the first month of renal failure associated with uric acid depletion, renal tubular damage, inflammation, fibrosis and oxidative stress |
| <i>XKR6</i>   | XK, Kell blood group complex subunit-related family, member 6 | ---                                                                                                                            | ---             |  | Keratolytic winter erythema and hydrocele    | ---                                                                                                                                                                                                                                                                                                         |
| <i>ZNF284</i> | zinc finger protein 284                                       | May be involved in transcriptional regulation                                                                                  | ---             |  | ---                                          | ---                                                                                                                                                                                                                                                                                                         |
| <i>ZNF746</i> | zinc finger protein 746                                       | Play a role in regulation of neuron death                                                                                      | Gene expression |  | ---                                          | ---                                                                                                                                                                                                                                                                                                         |

---

**Table S21. Significantly enriched KEGG pathways for 70 adaptively convergent genes between giant and red pandas, using the 14,254 genes as the reference. The KEGG pathways associated with the utilization of essential nutrients are in red italics.**

| <b>KEGG ID</b> | <b>KEGG Pathway</b>                          | <b>Observed number<br/>of genes</b> | <b>Expected number<br/>of genes</b> | <b><i>P-value</i></b> |
|----------------|----------------------------------------------|-------------------------------------|-------------------------------------|-----------------------|
| <i>ko04974</i> | <i>Protein digestion and absorption</i>      | <i>3</i>                            | <i>0.420853</i>                     | <i>0.00858522</i>     |
| ko04530        | Tight junction                               | 3                                   | 0.559487                            | 0.018456              |
| <i>ko00830</i> | <i>Retinol metabolism</i>                    | <i>2</i>                            | <i>0.227756</i>                     | <i>0.021732</i>       |
| ko00982        | Drug metabolism - cytochrome P450            | 2                                   | 0.24261                             | 0.0244598             |
| ko00980        | Metabolism of xenobiotics by cytochrome P450 | 2                                   | 0.257463                            | 0.0273199             |
| ko05204        | Chemical carcinogenesis                      | 2                                   | 0.282219                            | 0.0323689             |
| ko04610        | Complement and coagulation cascades          | 2                                   | 0.282219                            | 0.0323689             |

**Table S22. Significantly enriched gene ontology (GO) terms at Biological Process level for 70 adaptively convergent genes between giant and red pandas, using the 14,254 genes as the reference. The GO terms associated with the limb development and utilization of essential nutrients are in red italics.**

| GO ID             | GO Term                                                            | Observed number of genes | Expected number of genes | <i>P-value</i>    |
|-------------------|--------------------------------------------------------------------|--------------------------|--------------------------|-------------------|
| GO:0050857        | positive regulation of antigen receptor mediated signaling pathway | 3                        | 0.0742682                | 5.06204E-05       |
| GO:0050854        | regulation of antigen receptor mediated signaling pathway          | 3                        | 0.188146                 | 0.000865113       |
| GO:0031953        | negative regulation of protein autophosphorylation                 | 2                        | 0.0544634                | 0.00129079        |
| GO:0050855        | regulation of B cell receptor signaling pathway                    | 2                        | 0.0594146                | 0.00154401        |
| GO:0022617        | extracellular matrix disassembly                                   | 4                        | 0.564439                 | 0.00243705        |
| <i>GO:0009235</i> | <i>cobalamin metabolic process</i>                                 | <i>2</i>                 | <i>0.0891219</i>         | <i>0.00351132</i> |
| GO:0072378        | blood coagulation fibrin clot formation                            | 2                        | 0.108927                 | 0.0052342         |
| GO:0042036        | negative regulation of cytokine biosynthetic process               | 2                        | 0.108927                 | 0.0052342         |
| GO:0032731        | positive regulation of interleukin 1 beta production               | 2                        | 0.113878                 | 0.00571445        |
| GO:0045577        | regulation of B cell differentiation                               | 2                        | 0.113878                 | 0.00571445        |
| <i>GO:0010927</i> | <i>cellular component assembly involved in morphogenesis</i>       | <i>5</i>                 | <i>1.15363</i>           | <i>0.00589438</i> |
| GO:0097202        | activation of cysteine type endopeptidase activity                 | 3                        | 0.386195                 | 0.00677684        |
| GO:0032732        | positive regulation of interleukin 1 production                    | 2                        | 0.133683                 | 0.00782762        |
| GO:0031952        | regulation of protein autophosphorylation                          | 2                        | 0.143585                 | 0.00899676        |
| GO:0045824        | negative regulation of innate immune response                      | 2                        | 0.148536                 | 0.0096088         |
| GO:0050777        | negative regulation of immune response                             | 3                        | 0.440658                 | 0.0097339         |
| GO:0045214        | sarcomere organization                                             | 2                        | 0.158439                 | 0.0108868         |
| GO:0007229        | integrin mediated signaling pathway                                | 3                        | 0.465414                 | 0.0112902         |
| GO:0032651        | regulation of interleukin 1 beta production                        | 2                        | 0.183195                 | 0.0143881         |
| GO:0031348        | negative regulation of defense response                            | 3                        | 0.519878                 | 0.0151944         |
| GO:0031638        | zymogen activation                                                 | 3                        | 0.519878                 | 0.0151944         |

|                   |                                                                                  |          |                 |                  |
|-------------------|----------------------------------------------------------------------------------|----------|-----------------|------------------|
| GO:2001056        | positive regulation of cysteine type endopeptidase activity                      | 3        | 0.524829        | 0.0155825        |
| GO:0050853        | B cell receptor signaling pathway                                                | 2        | 0.193097        | 0.0159073        |
| GO:0030049        | muscle filament sliding&actin myosin filament sliding                            | 2        | 0.193097        | 0.0159073        |
| GO:0017144        | drug metabolic process                                                           | 2        | 0.207951        | 0.0183086        |
| GO:0002920        | regulation of humoral immune response                                            | 2        | 0.207951        | 0.0183086        |
| GO:0002244        | hematopoietic progenitor cell differentiation                                    | 3        | 0.559487        | 0.018456         |
| GO:0032611        | interleukin 1 beta production                                                    | 2        | 0.212902        | 0.0191411        |
| GO:0010950        | positive regulation of endopeptidase activity                                    | 3        | 0.56939         | 0.0193275        |
| GO:0071230        | cellular response to amino acid stimulus                                         | 2        | 0.217854        | 0.0199892        |
| GO:0032652        | regulation of interleukin 1 production                                           | 2        | 0.217854        | 0.0199892        |
| <i>GO:0035107</i> | <i>appendage morphogenesis&amp;limb morphogenesis</i>                            | <i>3</i> | <i>0.609</i>    | <i>0.023039</i>  |
| GO:0010952        | positive regulation of peptidase activity                                        | 3        | 0.623853        | 0.024524         |
| GO:0032612        | interleukin 1 production                                                         | 2        | 0.252512        | 0.0263521        |
| <i>GO:0033013</i> | <i>tetrapyrrole metabolic process</i>                                            | <i>2</i> | <i>0.257463</i> | <i>0.0273199</i> |
| GO:0030239        | myofibril assembly                                                               | 2        | 0.262414        | 0.0283019        |
| GO:0007041        | lysosomal transport                                                              | 2        | 0.267366        | 0.0292979        |
| <i>GO:0048736</i> | <i>appendage development&amp;limb development</i>                                | <i>3</i> | <i>0.69317</i>  | <i>0.0321244</i> |
| GO:0045582        | positive regulation of T cell differentiation                                    | 2        | 0.282219        | 0.0323689        |
| <i>GO:0042384</i> | <i>cilium assembly</i>                                                           | <i>3</i> | <i>0.737731</i> | <i>0.0375893</i> |
| GO:0030574        | collagen catabolic process                                                       | 2        | 0.336683        | 0.044632         |
| GO:0045621        | positive regulation of lymphocyte differentiation                                | 2        | 0.341634        | 0.0458205        |
| GO:0006919        | activation of cysteine type endopeptidase activity involved in apoptotic process | 2        | 0.351536        | 0.0482324        |
| GO:0002698        | negative regulation of immune effector process                                   | 2        | 0.351536        | 0.0482324        |
| <i>GO:0044782</i> | <i>cilium organization</i>                                                       | <i>3</i> | <i>0.821902</i> | <i>0.0491226</i> |
| GO:0002027        | regulation of heart rate                                                         | 2        | 0.356488        | 0.0494554        |

---

**Table S23. PCR sequencing results for two convergent amino acid sites of DYNC2H1 in an Asiatic black bear, a striped skunk and a raccoon.**

| <b>Target gene</b> | <b>Target site</b> | <b>Primer name</b> | <b>Primer sequences</b> | <b>Targeted species</b>                      | <b>Nucleotide codon confirmed</b> | <b>Amino acid confirmed</b> |
|--------------------|--------------------|--------------------|-------------------------|----------------------------------------------|-----------------------------------|-----------------------------|
| <i>DYNC2H1</i>     | R3128K             | DYNC2H1-U1F        | TCCCTTGGTTTCATTTTGGTA   | Asiatic black bear / striped skunk / raccoon | AGG                               | 3128R                       |
|                    |                    | DYNC2H1-U1R        | AAGATTTTCAAAACTGAAACATT |                                              |                                   |                             |
|                    | K3999R             | DYNC2H1-U2F        | ATAGACTGAAAGTTAGATTTAC  | Asiatic black bear / striped skunk / raccoon | AAA                               | 3999K                       |
|                    |                    | DYNC2H1-U2R        | GCTTGTGGGGTCTGAWGTAT    |                                              |                                   |                             |
|                    |                    | DYNC2H1-U2F2       | GGGTCCCTTTGAATGTGGTGA   |                                              |                                   |                             |
|                    |                    | DYNC2H1-U2R        | GCTTGTGGGGTCTGAWGTAT    |                                              |                                   |                             |

**Table S24. PCR validation results for one frame-shift mutation of *TAS1R1* gene and 19 convergent amino acid sites of nine adaptively convergent genes. The Sanger sequencing results of three giant pandas, three red pandas, a polar bear and a ferret confirmed the existence of the frame-shift mutation and these convergent amino acid sites.**

| Target gene    | Target site         | Primer name                  | Primer sequences                             | Targeted species     | Nucleotide codon confirmed | Amino acid confirmed |       |
|----------------|---------------------|------------------------------|----------------------------------------------|----------------------|----------------------------|----------------------|-------|
| <i>TAS1R1</i>  | 1751 del C (exon 6) | TAS1R1-RP-6F<br>TAS1R1-RP-6R | AGCCTTCTGCCTTTCCTTCC<br>GCCTCGTGTAGTCCTGGATG | red panda            | 1751 del C (exon 6)        | —                    |       |
| <i>DYNC2H1</i> | R3128K              | DYNC2H1-GP-1F                | CCTGTTGTCCTCAGTTGCT                          | giant panda          | AAG                        | 3128K                |       |
|                |                     | DYNC2H1-GP-1R                | CATTCTGTCCCTCTTGCTC                          |                      |                            |                      |       |
|                |                     | DYNC2H1-RP-1F                | TTATGCAGAGCACAGAGGC                          | red panda            | AAG                        | 3128K                |       |
|                |                     | DYNC2H1-RP-1R                | AGGAACAGAGCAGTGACAG                          |                      |                            |                      |       |
|                |                     | DYNC2H1-PB-1F                | TGGAGGTGTTAAGAGGAT                           | polar bear           | AGG                        | 3128R                |       |
|                |                     | DYNC2H1-PB-1R                | CACGCCACAGGTAAGGAC                           |                      |                            |                      |       |
|                |                     | DYNC2H1-FE-1F                | GGCTGTTTCTGCTGTTAT                           | ferret               | AGG                        | 3128R                |       |
|                |                     | DYNC2H1-FE-1R                | GCAATCTTGCATGAGGGA                           |                      |                            |                      |       |
|                |                     | DYNC2H1-GP-2F                | GGACTGAAGACTCGCTGTG                          | giant panda          | AGA                        | 3999R                |       |
|                | DYNC2H1-GP-2R       | TTAAAGAATGGCTTGTGGG          |                                              |                      |                            |                      |       |
|                | K3999R              | DYNC2H1-RP-2F                | CCTTGGAATAAGCCGAAC                           | red panda            | AGA                        | 3999R                |       |
|                |                     | DYNC2H1-RP-2R                | ACCTGTCCCGATGAGCACC                          |                      |                            |                      |       |
|                |                     | DYNC2H1-PB-2F                | GGGGTTCTGTAAGTTTGG                           | polar bear           | AAA                        | 3999K                |       |
|                |                     | DYNC2H1-PB-2R                | TAAAGAATGGCTTGTGGG                           |                      |                            |                      |       |
|                |                     | DYNC2H1-FE-2F                | CAGATGAGTCTCGGGTAG                           | ferret               | AAA                        | 3999K                |       |
|                |                     | DYNC2H1-FE-2R                | TTTGGAGGAAGTGATAGTG                          |                      |                            |                      |       |
|                |                     | <i>PCNT</i>                  | S2327P                                       | PCNT-GP-1F           | CACTCTTGTTTGGGTTCTGT       | giant panda          | CCC   |
|                | PCNT-GP-1R          |                              |                                              | CTGTGCTGTTCTGCTCCTT  |                            |                      |       |
|                | PCNT-RP-1F          |                              |                                              | TGTGCTCCCAAGCGTGTAAT | red panda                  | CCC                  | 2327P |
| PCNT-RP-1R     | CCAGTGCCAAAGGGTCCAA |                              |                                              |                      |                            |                      |       |
| PCNT-PB-1F     | CGTGGCTGGGTTTGTTTA  |                              |                                              | polar bear           | TCC                        | 2327S                |       |

|               |        |            |                         |                            |          |            |
|---------------|--------|------------|-------------------------|----------------------------|----------|------------|
|               |        | PCNT-PB-1R | TCCGTGCTGTTCTGTTCC      |                            |          |            |
|               |        | PCNT-FE-1F | AAGTTTCCATCTGGCTAGTTC   | ferret                     | ACC      | 2327T      |
|               |        | PCNT-FE-1R | ACAAGGAGGTCTGGGTGC      |                            |          |            |
|               |        | PCNT-GP-2F | TGCTGTCGGGTCGTTTCTG     | giant panda                | CGG      | 2458R      |
|               |        | PCNT-GP-2R | TGCCACGTTCCAAGGTCAA     |                            |          |            |
|               |        | PCNT-RP-2F | TCCGTGAAGGGACCTACCAA    | red panda                  | CGC      | 2458R      |
|               | Q2458R | PCNT-RP-2R | AGGCCAGTTACTTCCAGAGCACA |                            |          |            |
|               |        | PCNT-PB-2F | TCTGCTGTTGGGTCGTTT      | polar bear                 | CAG      | 2458Q      |
|               |        | PCNT-PB-2R | CATGTGCTCACCTGCTCC      |                            |          |            |
|               |        | PCNT-FE-2F | TTCGGTAGTGTCTCCTCTGTCA  | ferret                     | CAG      | 2458Q      |
|               |        | PCNT-FE-2R | TGCTCCTGGACCACCTTCT     |                            |          |            |
|               |        | PRSS1-F    | AGGTGATCTTGCCCACTCC     | giant panda<br>/ red panda | AAC      | 119N       |
|               | D119N  | PRSS1-R    | CACTCACTGCCAGAGCTCA     | polar bear /<br>ferret     | GAC      | 119D       |
| <i>PRSS1</i>  |        | PRSS1-F    | AGGTGATCTTGCCCACTCC     | giant panda                | GTC      | 140V       |
|               | I140V  | PRSS1-R    | CACTCACTGCCAGAGCTCA     | red panda                  | GTA      | 140V       |
|               |        |            |                         | polar bear                 | ATC      | 140I       |
|               |        |            |                         | ferret                     | ATA      | 140I       |
|               |        | PRSS36-F   | GAACCTGAWGATCTAGGTA     | giant panda<br>/ red panda | AGC      | 57S        |
| <i>PRSS36</i> | R57S   | PRSS36-R   | GGKGGAGTGGTGGGGCGAGT    | polar bear                 | CGC      | 57R        |
|               |        | PRSS36-2F  | CCWTCAGCCCCATCCCAGGAG   | ferret                     | CGC      | 57R        |
|               |        | PRSS36-2R  | CACGTCASGAARCAGTGAGC    |                            |          |            |
|               |        | CPB1-1F    | AGTCTATGTAAATTTTAGTAG   | giant panda<br>/ red panda | TTC      | 218F       |
| <i>CPB1</i>   | V218F  | CPB1-1R    | TGCCAATGCAGGTAGTTCC     | polar bear /<br>ferret     | GTC      | 218V       |
|               | T271I, | CPB1-3F    | ACTATATTGATCTCATTGT     | giant panda                | ATT, CTG | 271I, 310L |



|               |                                     |                        |                                               |                                                      |                       |                           |
|---------------|-------------------------------------|------------------------|-----------------------------------------------|------------------------------------------------------|-----------------------|---------------------------|
|               | M310L                               | CPB1-R                 | TTAGCTAATTTATCTAGCC                           | / red panda                                          |                       |                           |
|               |                                     | CPB1-3F                | ACTATATTGATCTCATTGT                           | ferret                                               | ACT, ATG              | 271T, 310M                |
|               |                                     | CPB1-2R                | TACCATACTTACTACCATG                           | polar bear                                           | ACT, ATG              | 271T, 310M                |
| <i>GIF</i>    | M212L                               | GIF1-F                 | GGCACTGCTACTTACCAGC                           | giant panda                                          | TTG                   | 212L                      |
|               |                                     | GIF1-R                 | AATAACCTGATATGTTTCTG                          | / red panda<br>polar bear /<br>ferret                | ATG                   | 212M                      |
|               | D406K,<br>H407D                     | GIF2-F                 | CCTCATGTTCTTCTCTGCT                           | giant panda                                          | AAG, GAT              | 406K, 407D                |
|               |                                     | GIF2-R                 | TCATTTATTCTACATAGTGG                          | red panda                                            | AAA, GAT              | 406K, 407D                |
|               |                                     | GIF2-2F<br>GIF2-2R     | CGGGTACTATATTAGCATCAA<br>CAGTCATTGCCTTGAGAAGC | ferret                                               | GAC, CAT              | 406D, 407H                |
| <i>CYP4F2</i> | M92F                                | CYP4F2-F               | CTTGGGACRTGGAGAGGCC                           | polar bear                                           | GAC, CAT              | 406D, 407H                |
|               |                                     | CYP4F2-R               | AGAGGARGATGGCTGAGAG                           | giant panda<br>/ red panda<br>polar bear /<br>ferret | TTT<br>ATG            | 92F<br>92M                |
| <i>CYP3A5</i> | T363S,<br>V393L,<br>M395I,<br>T400S | CYP3A5-3F              | YATAAATGCCTGTTAMCA                            | giant panda                                          | AGT, TTA, ATA,<br>AGT | 363S, 393L,<br>395I, 400S |
|               |                                     | CYP3A5-3R              | GACAACAATGATCATTTTGT                          | red panda                                            | AGT, TTG, ATA,<br>TCT | 363S, 393L,<br>395I, 400S |
|               |                                     | CYP3A5-6F              | CTACTGCATATAAGTCAGTG                          | polar bear                                           | ACT, GTG, ATG,<br>ACT | 363T, 393V,<br>395M, 400T |
|               |                                     | CYP3A5-6R              | TCCACAAGGACATATGTATC                          | ferret                                               | ACT, GTG, ATG,<br>ACT | 363T, 393V,<br>395M, 400T |
|               |                                     | CYP3A5-7F<br>CYP3A5-7R | CCGACAGTCTCCCTTCGTCA<br>ATAATTGTACAACCACGTGC  |                                                      |                       |                           |
| <i>ADH1C</i>  | V187I                               | CYP3A5-4F<br>CYP3A5-4R | AGTGACTTATGTCCCTACTCT<br>GAATAATTGTACAGCCACAG |                                                      |                       |                           |
|               |                                     | ADH1C-F                | CTGCAGAGGAAAGCCCATCC                          | giant panda<br>/ red panda                           | ATT                   | 187I                      |
|               |                                     | ADH1C-R                | AATGCTCYTCAATTCCTTC                           | polar bear /<br>ferret                               | GTT                   | 187V                      |

**Table S25. Population-level genome dataset or database survey for convergent amino acid substitutions of *DYNC2H1* and *PCNT* in giant and red pandas.**

| <b>Species</b> | <b>Variant 1 of <i>DYNC2H1</i></b> | <b>Variant 2 of <i>DYNC2H1</i></b> | <b>Variant 1 of <i>PCNT</i></b> | <b>Variant 2 of <i>PCNT</i></b> | <b>Dataset or database used</b>                                              | <b>References</b>                                                                                                                                                                                                                                                       |
|----------------|------------------------------------|------------------------------------|---------------------------------|---------------------------------|------------------------------------------------------------------------------|-------------------------------------------------------------------------------------------------------------------------------------------------------------------------------------------------------------------------------------------------------------------------|
| giant panda    | AAG                                | AGA                                | CCC                             | CGG                             | Population resequencing data from 49 giant pandas                            | Ref. 18                                                                                                                                                                                                                                                                 |
| polar bear     | AGG                                | AAA                                | TCC                             | CAG                             | Population resequencing data from 37 polar bears                             | Ref. 19                                                                                                                                                                                                                                                                 |
| dog            | AGG                                | AAA                                | TCC                             | CAG                             | Dog Genome SNP Database with 77 samples                                      | <a href="http://dogsd.big.ac.cn/snp/pages/download/snp.jsp">http://dogsd.big.ac.cn/snp/pages/download/snp.jsp</a>                                                                                                                                                       |
| mouse          | AGG                                | AAG                                | TCC                             | CAA                             | dbSNP Build 146                                                              | <a href="ftp://ftp.ncbi.nlm.nih.gov/snp/">ftp://ftp.ncbi.nlm.nih.gov/snp/</a>                                                                                                                                                                                           |
| human          | AGG                                | AAA                                | TCA                             | CAA                             | 1000 Genomes Project Phase 3 variants, dbSNP Build 146, Exome Variant Server | <a href="http://www.internationalgenome.org/data">http://www.internationalgenome.org/data</a> ,<br><a href="ftp://ftp.ncbi.nlm.nih.gov/snp/">ftp://ftp.ncbi.nlm.nih.gov/snp/</a> ,<br><a href="http://evs.gs.washington.edu/EVS/">http://evs.gs.washington.edu/EVS/</a> |

**Table S26. Comparison of Lys and Arg content in different animals and plants including bamboo. DM, dry matter; USDA database, USDA National Nutrient Database for Standard Reference Release 27, <http://ndb.nal.usda.gov/ndb/nutrients/index>.**

| <b>Species</b>                           | <b>Measure part</b> | <b>Lys (g/100g DM)</b> | <b>Arg (g/100g DM)</b> | <b>Data source</b> |
|------------------------------------------|---------------------|------------------------|------------------------|--------------------|
| Deer ( <i>Odocoileus spp.</i> )          | meat                | 7.590                  | 6.254                  | USDA database      |
| Rabbit ( <i>Sylvilagus spp.</i> )        | meat                | 7.485                  | 5.281                  | USDA database      |
| Squirrel (Sciuridae)                     | meat                | 5.869                  | 4.230                  | USDA database      |
| Muskrat ( <i>Ondatra zibethica</i> )     | meat                | 5.312                  | 3.250                  | USDA database      |
| Amaranth ( <i>Amaranthus spp.</i> )      | leaf                | 1.528                  | 1.456                  | USDA database      |
| Chicory ( <i>Cichorium intybus</i> )     | leaf                | 0.838                  | 1.550                  | USDA database      |
| Almonds ( <i>Prunus dulcis</i> )         | nuts                | 0.849                  | 2.579                  | USDA database      |
| Acorns ( <i>Quercus spp.</i> )           | nuts                | 0.533                  | 0.656                  | USDA database      |
| Chestnuts ( <i>Castanea mollissima</i> ) | nuts                | 0.407                  | 0.767                  | USDA database      |
| Bamboo ( <i>Fargesia robusta</i> )       | leaf                | 0.65                   | 0.56                   | Ref. 20            |
| Bamboo ( <i>Fargesia robusta</i> )       | stem                | 0.14                   | 0.09                   | Ref. 20            |
| Bamboo ( <i>Fargesia qinlingensis</i> )  | leaf                | 0.505                  | 0.441                  | Ref. 21            |
| Bamboo ( <i>Fargesia qinlingensis</i> )  | stem                | 0.065                  | 0.039                  | Ref. 21            |
| Bamboo ( <i>Bashania fargesii</i> )      | leaf                | 0.361                  | 0.276                  | Ref. 21            |
| Bamboo ( <i>Bashania fargesii</i> )      | stem                | 0.081                  | 0.041                  | Ref. 21            |

**Table S27. Comparison of linoleic acid (18:2) content in different animals and plants including bamboo. DM, dry matter; USDA database, USDA National Nutrient Database for Standard Reference Release 27, <http://ndb.nal.usda.gov/ndb/nutrients/index>.**

| <b>Species</b>                                            | <b>18:2 (g/100g DM)</b> | <b>Data source</b> |
|-----------------------------------------------------------|-------------------------|--------------------|
| Sunflower ( <i>Helianthus annuus</i> )                    | 24.19                   | USDA database      |
| Pecan ( <i>Carya illinoensis</i> )                        | 21.38                   | USDA database      |
| Almonds ( <i>Prunus dulcis</i> )                          | 12.89                   | USDA database      |
| Bamboo ( <i>Phyllostachys spp.</i> )                      | 1.22                    | USDA database      |
| Clover ( <i>Trifolium repens</i> and <i>T. pratense</i> ) | 0.8                     | Ref. 22            |
| Grass ( <i>Dactylis glomerata</i> )                       | 0.4                     | Ref. 22            |
| Broccoli raab ( <i>Brassica ruvo</i> )                    | 0.27                    | USDA database      |
| Pork ( <i>Sus scrofa</i> )                                | 2.01                    | USDA database      |
| Bison ( <i>Bison bison</i> )                              | 0.87                    | Ref. 23            |
| Elk ( <i>Cervus elaphus</i> )                             | 0.81                    | Ref. 23            |
| Beef cattle ( <i>Bos taurus</i> )                         | 0.44                    | Ref. 23            |

**Table S28. Comparison of  $\beta$ -carotene content in different plants including bamboo. DM, dry matter; USDA database, USDA National Nutrient Database for Standard Reference Release 27, <http://ndb.nal.usda.gov/ndb/nutrients/index>.**

| <b>Species</b>                            | <b>Measure part</b> | <b><math>\beta</math>-carotene (<math>\mu\text{g}/100\text{g DM}</math>)</b> | <b>Data source</b> |
|-------------------------------------------|---------------------|------------------------------------------------------------------------------|--------------------|
| Carrot ( <i>Daucus carota</i> )           |                     | 70,751.49                                                                    | USDA database      |
| Spinach ( <i>Spinacia oleracea</i> )      |                     | 65,418.60                                                                    | USDA database      |
| Chicory ( <i>Cichorium intybus</i> )      | leaf                | 42,875.00                                                                    | USDA database      |
| Dandelion ( <i>Taraxacum officinale</i> ) | leaf                | 40,652.78                                                                    | USDA database      |
| Broccoli raab ( <i>Brassica ruvo</i> )    |                     | 21,114.09                                                                    | USDA database      |
| Bamboo ( <i>Fargesia spatgacens</i> )     | leaf                | 6,620                                                                        | Ref. 24            |
| Bamboo ( <i>Fargesia spatgacens</i> )     | branch              | 775                                                                          | Ref. 24            |
| Bamboo ( <i>Phyllostachys spp.</i> )      | shoot               | 133.33                                                                       | USDA database      |
| Pecans ( <i>Carya illinoensis</i> )       | nuts                | 30.06                                                                        | USDA database      |
| Almonds ( <i>Prunus dulcis</i> )          | nuts                | 1.05                                                                         | USDA database      |

**Table S29. Ten shared pseudogenes between red and giant pandas that result from nonsense or frame-shift mutations of protein-coding sequences.**

| <b>Gene symbol</b> | <b>Species</b> | <b>Variation</b> | <b>No. of exon with variation</b> | <b>Length of exon with variation (bp)</b> |
|--------------------|----------------|------------------|-----------------------------------|-------------------------------------------|
| <i>OR4K1</i>       | red panda      | indel            | 1                                 | 933                                       |
|                    | giant panda    | SNP              | 1                                 | 933                                       |
| <i>KCNRG</i>       | red panda      | SNP              | 1                                 | 578                                       |
|                    | giant panda    | indel            | 2                                 | 238                                       |
| <i>TAS1R1</i>      | red panda      | indel            | 6                                 | 929                                       |
|                    | giant panda    | indel            | 3, 6                              | 762, 929                                  |
| <i>OR2AG2</i>      | red panda      | indel            | 1                                 | 948                                       |
|                    | giant panda    | indel            | 1                                 | 948                                       |
| <i>SPEF2</i>       | red panda      | indel            | 4                                 | 171                                       |
|                    | giant panda    | SNP              | 37                                | 87                                        |
| <i>SYNE2</i>       | red panda      | indel            | 24                                | 91                                        |
|                    | giant panda    | indel            | 46                                | 266                                       |
| <i>PSAT1</i>       | red panda      | indel            | 8                                 | 138                                       |
|                    | giant panda    | SNP              | 8                                 | 138                                       |
| <i>SMPD4</i>       | red panda      | indel            | 2                                 | 84                                        |
|                    | giant panda    | indel            | 8                                 | 152                                       |
| <i>SRSF10</i>      | red panda      | indel            | 1                                 | 65                                        |
|                    | red panda      | SNP              | 4                                 | 163                                       |
|                    | giant panda    | indel            | 6                                 | 295                                       |
| <i>ANKDD1B</i>     | red panda      | indel            | 12                                | 202                                       |
|                    | giant panda    | indel            | 13                                | 132                                       |
